# Supplementary material for: Transcriptome profiling revealed novel transcriptional regulators in maize responses to Ostrinia furnacalis and jasmonic acid
Source: PLoS One. 2017 May 16;12(5):e0177739. doi: 10.1371/journal.pone.0177739 (PMC5433750; doi:10.1371/journal.pone.0177739)
Supplement: S3 Table — (XLSX) [file pone.0177739.s006.xlsx]

## Sheet: Zea_mays.geneStructure.optimize
#GeneID	Locus	Strand	Site	OriginalRegion	OptimizeRegion
AC155390.2_FG002	1:32671230-32674181	-	3'	32672150-32672150	32671230-32672150
AC155390.2_FG002	1:32671230-32674181	-	5'	32674147-32674147	32674147-32674181
AC155624.2_FG006	1:8259927-8284461	+	5'	8260041-8260367	8259927-8260367
AC155624.2_FG011	1:8285324-8288785	-	3'	8285569-8285569	8285324-8285569
AC155624.2_FG011	1:8285324-8288785	-	5'	8288645-8288645	8288645-8288785
AC166636.1_FG007	1:19970733-19972534	-	3'	19971519-19971519	19970733-19971519
AC166636.1_FG007	1:19970733-19972534	-	5'	19972363-19972363	19972363-19972534
AC166636.1_FG008	1:19979774-19983221	+	5'	19979839-19979976	19979774-19979976
AC166636.1_FG008	1:19979774-19983221	+	3'	19982491-19982658	19982491-19983221
AC177897.2_FG002	1:260193666-260198632	+	3'	260198235-260198235	260198235-260198632
AC177908.3_FG002	1:72808389-72814006	-	3'	72808429-72808750	72808389-72808750
AC177908.3_FG002	1:72808389-72814006	-	5'	72813450-72813891	72813450-72814006
AC177936.6_FG008	1:285707027-285719829	+	3'	285719644-285719644	285719644-285719829
AC185588.2_FG002	1:297260140-297265049	-	3'	297260790-297260790	297260140-297260790
AC187207.3_FG006	1:13366412-13368795	-	3'	13367122-13367122	13366412-13367122
AC190915.3_FG007	1:273943245-273957937	-	5'	273957793-273957793	273957793-273957937
AC191009.3_FG004	1:298576041-298583112	+	3'	298582821-298582821	298582821-298583112
AC191575.2_FG001	1:295351638-295380121	-	3'	295351659-295351969	295351638-295351969
AC191575.2_FG001	1:295351638-295380121	-	5'	295379910-295380113	295379910-295380121
AC192362.3_FG002	1:230180972-230184973	+	3'	230184737-230184737	230184737-230184973
AC194264.3_FG006	1:205545892-205574493	+	5'	205546205-205546205	205545892-205546205
AC196066.3_FG003	1:248480832-248521123	-	5'	248520954-248520954	248520954-248521123
AC197246.3_FG003	1:192020795-192024142	+	3'	192023663-192023663	192023663-192024142
AC197387.3_FG004	1:63920242-63923301	+	5'	63922832-63922832	63920242-63922832
AC197387.3_FG004	1:63920242-63923301	+	3'	63923296-63923296	63923296-63923301
AC198361.3_FG004	1:233387650-233393944	-	5'	233393644-233393644	233393644-233393944
AC199826.4_FG003	1:215579250-215581275	+	3'	215580151-215580151	215580151-215581275
AC199893.4_FG002	1:229768409-229774403	+	5'	229768676-229768676	229768409-229768676
AC203966.5_FG003	1:299687810-299689786	+	5'	299687924-299687924	299687810-299687924
AC203966.5_FG003	1:299687810-299689786	+	3'	299688748-299688748	299688748-299689786
AC204530.4_FG002	1:61615165-61625337	+	5'	61615320-61615320	61615165-61615320
AC204530.4_FG006	1:61669369-61673877	+	5'	61669643-61669643	61669369-61669643
AC205077.3_FG003	1:103568607-103570675	-	3'	103568665-103568665	103568607-103568665
AC205077.3_FG003	1:103568607-103570675	-	5'	103569338-103569338	103569338-103570675
AC205175.3_FG002	1:100588933-100605965	-	3'	100590635-100590635	100588933-100590635
AC205336.3_FG003	1:160649758-160651690	+	3'	160651626-160651626	160651626-160651690
AC205725.3_FG010	1:23579023-23585520	+	5'	23581657-23581657	23579023-23581657
AC205725.3_FG010	1:23579023-23585520	+	3'	23585141-23585141	23585141-23585520
AC205730.3_FG002	1:166342788-166364315	+	5'	166343076-166343076	166342788-166343076
AC205730.3_FG002	1:166342788-166364315	+	3'	166359595-166359595	166359595-166364315
AC206201.3_FG004	1:295078237-295084266	-	3'	295078251-295078251	295078237-295078251
AC206989.4_FG002	1:196339298-196340312	+	3'	196340171-196340171	196340171-196340312
AC207225.3_FG003	1:124671661-124679286	+	5'	124675557-124675557	124671661-124675557
AC207225.3_FG003	1:124671661-124679286	+	3'	124677280-124677280	124677280-124679286
AC207347.3_FG005	1:252853758-252860765	+	3'	252860409-252860409	252860409-252860765
AC208113.3_FG009	1:263112588-263114412	+	5'	263112725-263112725	263112588-263112725
AC208201.3_FG003	1:45341794-45345590	+	5'	45342500-45342500	45341794-45342500
AC208201.3_FG003	1:45341794-45345590	+	3'	45345073-45345073	45345073-45345590
AC208436.3_FG007	1:45103360-45110167	+	5'	45103542-45103542	45103360-45103542
AC208440.3_FG003	1:227498140-227513773	-	5'	227513614-227513614	227513614-227513773
AC208571.4_FG001	1:50625950-50709841	+	3'	50709672-50709672	50709672-50709841
AC208897.3_FG004	1:27122293-27128310	-	3'	27122677-27122677	27122293-27122677
AC208897.3_FG004	1:27122293-27128310	-	5'	27128168-27128168	27128168-27128310
AC209626.2_FG013	1:17883585-17884877	+	3'	17884563-17884563	17884563-17884877
AC211390.3_FG001	1:97042658-97048173	+	3'	97047761-97047761	97047761-97048173
AC211892.4_FG002	1:294973323-294987194	+	3'	294986847-294986847	294986847-294987194
AC212023.4_FG006	1:224839272-224843210	+	5'	224839620-224839620	224839272-224839620
AC212023.4_FG006	1:224839272-224843210	+	3'	224842267-224842267	224842267-224843210
AC212219.3_FG005	1:44959525-44965177	-	5'	44965028-44965073	44965028-44965177
AC214040.3_FG009	1:36160145-36162192	+	5'	36160208-36160208	36160145-36160208
AC216247.3_FG005	1:63576872-63614479	+	5'	63577230-63577230	63576872-63577230
AC217050.4_FG001	1:214892233-214896899	+	5'	214892527-214892527	214892233-214892527
AC217050.4_FG001	1:214892233-214896899	+	3'	214896863-214896863	214896863-214896899
AC217050.4_FG004	1:214826248-214832537	-	5'	214832390-214832390	214832390-214832537
AC217050.4_FG006	1:214949943-214953233	-	3'	214950175-214950175	214949943-214950175
AC217050.4_FG007	1:214936624-214943461	-	3'	214936884-214936884	214936624-214936884
AC217050.4_FG007	1:214936624-214943461	-	5'	214943223-214943430	214943223-214943461
AC217358.3_FG003	1:296983914-296988193	-	3'	296984345-296984345	296983914-296984345
AC217358.3_FG003	1:296983914-296988193	-	5'	296988107-296988107	296988107-296988193
AC217401.3_FG001	1:264916452-264919770	-	3'	264916581-264916581	264916452-264916581
AC217401.3_FG001	1:264916452-264919770	-	5'	264919589-264919589	264919589-264919770
AC217401.3_FG002	1:264921042-264929932	-	5'	264929820-264929904	264929820-264929932
AC217401.3_FG003	1:264930575-264937194	-	3'	264930909-264930909	264930575-264930909
AC225147.4_FG003	1:292952245-292956382	-	3'	292952249-292952620	292952245-292952620
AC225147.4_FG003	1:292952245-292956382	-	5'	292956058-292956375	292956058-292956382
AC226368.2_FG006	1:63042591-63045076	-	3'	63042944-63042944	63042591-63042944
AC226368.2_FG006	1:63042591-63045076	-	5'	63044584-63044584	63044584-63045076
AC233878.1_FG004	1:272711342-272737743	-	3'	272711753-272711753	272711342-272711753
AC233935.1_FG005	1:40917141-40919307	-	3'	40917520-40917520	40917141-40917520
AC233935.1_FG005	1:40917141-40919307	-	5'	40918920-40918920	40918920-40919307
AC234157.1_FG002	1:281175141-281177085	-	3'	281175269-281175269	281175141-281175269
AC234157.1_FG002	1:281175141-281177085	-	5'	281177006-281177006	281177006-281177085
AC234203.1_FG004	1:188116110-188123644	-	3'	188116698-188116698	188116110-188116698
AC234203.1_FG009	1:188092783-188096498	+	5'	188093915-188093915	188092783-188093915
AC234203.1_FG009	1:188092783-188096498	+	3'	188095642-188095642	188095642-188096498
AC234203.1_FG010	1:188096904-188100438	-	3'	188097107-188097107	188096904-188097107
AC234520.1_FG003	1:164385157-164387428	-	3'	164385468-164385468	164385157-164385468
AC234520.1_FG005	1:164506311-164510501	+	5'	164506541-164506541	164506311-164506541
AC234520.1_FG005	1:164506311-164510501	+	3'	164510114-164510114	164510114-164510501
AC234528.1_FG001	1:204265152-204280253	-	3'	204265288-204265288	204265152-204265288
AC234528.1_FG001	1:204265152-204280253	-	5'	204279896-204279896	204279896-204280253
AC234528.1_FG004	1:204297167-204298442	-	3'	204297394-204297394	204297167-204297394
AC234528.1_FG004	1:204297167-204298442	-	5'	204298228-204298228	204298228-204298442
AC234528.1_FG005	1:204299027-204304225	-	3'	204299081-204299385	204299027-204299385
AC234528.1_FG005	1:204299027-204304225	-	5'	204304041-204304179	204304041-204304225
AC235547.1_FG005	1:282473544-282478002	-	3'	282473696-282473696	282473544-282473696
AC235547.1_FG005	1:282473544-282478002	-	5'	282477456-282477456	282477456-282478002
AY542798.1_FG003	1:258930826-258936069	+	5'	258931432-258931432	258930826-258931432
AY542798.1_FG003	1:258930826-258936069	+	3'	258935850-258935850	258935850-258936069
GRMZM2G000622	1:268624221-268630592	-	5'	268630304-268630527	268630304-268630592
GRMZM2G000686	1:15805371-15808637	-	3'	15805373-15805918	15805371-15805918
GRMZM2G000823	1:12143599-12148243	+	5'	12143635-12143745	12143599-12143745
GRMZM2G001079	1:44180911-44184916	+	5'	44180951-44181332	44180911-44181332
GRMZM2G001663	1:35738490-35743712	+	5'	35738669-35738979	35738490-35738979
GRMZM2G001663	1:35738490-35743712	+	3'	35743261-35743639	35743261-35743712
GRMZM2G001676	1:233457225-233460616	-	3'	233457234-233457400	233457225-233457400
GRMZM2G001676	1:233457225-233460616	-	5'	233460398-233460466	233460398-233460616
GRMZM2G001699	1:233461603-233465523	+	5'	233461624-233461624	233461603-233461624
GRMZM2G002002	1:20281253-20291814	-	5'	20291576-20291576	20291576-20291814
GRMZM2G002138	1:158198679-158204415	-	3'	158198743-158198973	158198679-158198973
GRMZM2G002898	1:223885990-223891909	-	3'	223887143-223887144	223885990-223887144
GRMZM2G002898	1:223885990-223891909	-	5'	223891742-223891904	223891742-223891909
GRMZM2G003304	1:218768608-218773421	-	5'	218772927-218773418	218772927-218773421
GRMZM2G003424	1:54122446-54126795	+	5'	54122528-54122947	54122446-54122947
GRMZM2G003509	1:173247011-173257985	-	5'	173257487-173257862	173257487-173257985
GRMZM2G003607	1:256345722-256352650	+	5'	256345800-256346060	256345722-256346060
GRMZM2G003607	1:256345722-256352650	+	3'	256351756-256352626	256351756-256352650
GRMZM2G003631	1:165985266-165988521	+	5'	165985301-165985301	165985266-165985301
GRMZM2G003724	1:237516978-237546306	+	5'	237517027-237517353	237516978-237517353
GRMZM2G003724	1:237516978-237546306	+	3'	237546123-237546227	237546123-237546306
GRMZM2G003984	1:48950075-48996295	-	3'	48950103-48950103	48950075-48950103
GRMZM2G004036	1:285460436-285462761	+	5'	285460486-285460486	285460436-285460486
GRMZM2G004036	1:285460436-285462761	+	3'	285462103-285462103	285462103-285462761
GRMZM2G004079	1:201226690-201230105	-	3'	201226717-201226952	201226690-201226952
GRMZM2G004079	1:201226690-201230105	-	5'	201229749-201229957	201229749-201230105
GRMZM2G004641	1:13639958-13643872	-	3'	13640026-13640441	13639958-13640441
GRMZM2G004736	1:71541313-71549019	+	5'	71541323-71541530	71541313-71541530
GRMZM2G005652	1:191123113-191128317	-	3'	191123119-191123512	191123113-191123512
GRMZM2G005652	1:191123113-191128317	-	5'	191127743-191128083	191127743-191128317
GRMZM2G005844	1:23215696-23223938	+	3'	23223441-23223909	23223441-23223938
GRMZM2G005955	1:212378295-212405626	-	5'	212405475-212405575	212405475-212405626
GRMZM2G006477	1:54344216-54351093	+	3'	54350247-54350977	54350247-54351093
GRMZM2G006781	1:19942572-19948364	-	5'	19948152-19948342	19948152-19948364
GRMZM2G007486	1:22735148-22738828	+	5'	22735201-22735362	22735148-22735362
GRMZM2G007555	1:167215819-167226908	+	5'	167215863-167216095	167215819-167216095
GRMZM2G007555	1:167215819-167226908	+	3'	167225574-167225574	167225574-167226908
GRMZM2G008072	1:278671711-278675180	-	3'	278671734-278671987	278671711-278671987
GRMZM2G008072	1:278671711-278675180	-	5'	278674498-278674963	278674498-278675180
GRMZM2G008226	1:218618199-218623932	-	5'	218623691-218623790	218623691-218623932
GRMZM2G008501	1:54463985-54469952	-	3'	54464197-54464811	54463985-54464811
GRMZM2G008501	1:54463985-54469952	-	5'	54469624-54469929	54469624-54469952
GRMZM2G008578	1:234351855-234353966	-	3'	234352995-234353035	234351855-234353035
GRMZM2G008578	1:234351855-234353966	-	5'	234353706-234353826	234353706-234353966
GRMZM2G008607	1:234369848-234382870	+	5'	234369876-234370035	234369848-234370035
GRMZM2G008663	1:219775738-219844902	+	5'	219775935-219775991	219775738-219775991
GRMZM2G008710	1:3876891-3880362	-	5'	3879348-3880199	3879348-3880362
GRMZM2G008789	1:192349880-192352929	+	5'	192350078-192350078	192349880-192350078
GRMZM2G009014	1:8509938-8514898	+	5'	8510046-8510547	8509938-8510547
GRMZM2G009014	1:8509938-8514898	+	3'	8514375-8514842	8514375-8514898
GRMZM2G009060	1:52392127-52395182	-	3'	52392455-52392484	52392127-52392484
GRMZM2G009368	1:264331694-264338585	+	5'	264332024-264332321	264331694-264332321
GRMZM2G009638	1:26037568-26151828	+	3'	26151427-26151814	26151427-26151828
GRMZM2G009655	1:123760502-123780037	-	3'	123760528-123761248	123760502-123761248
GRMZM2G010052	1:276278332-276286224	-	3'	276278495-276278797	276278332-276278797
GRMZM2G010353	1:286390095-286398727	+	5'	286390345-286390345	286390095-286390345
GRMZM2G010353	1:286390095-286398727	+	3'	286398537-286398537	286398537-286398727
GRMZM2G010362	1:231541783-231575536	-	3'	231541845-231542289	231541783-231542289
GRMZM2G010362	1:231541783-231575536	-	5'	231575135-231575348	231575135-231575536
GRMZM2G010871	1:239674468-239678142	-	3'	239674470-239674886	239674468-239674886
GRMZM2G010871	1:239674468-239678142	-	5'	239677361-239678097	239677361-239678142
GRMZM2G011078	1:246465418-246469221	-	3'	246465476-246465960	246465418-246465960
GRMZM2G011078	1:246465418-246469221	-	5'	246468838-246469206	246468838-246469221
GRMZM2G011483	1:49648038-49656973	-	5'	49656577-49656761	49656577-49656973
GRMZM2G011518	1:106910716-106914161	+	3'	106912919-106914134	106912919-106914161
GRMZM2G012102	1:16176172-16178157	-	3'	16176207-16176310	16176172-16176310
GRMZM2G012102	1:16176172-16178157	-	5'	16177901-16177978	16177901-16178157
GRMZM2G012119	1:246605518-246608098	+	5'	246605656-246606457	246605518-246606457
GRMZM2G012126	1:29355697-29361914	+	5'	29355738-29355801	29355697-29355801
GRMZM2G012156	1:167533022-167538237	+	3'	167537994-167538156	167537994-167538237
GRMZM2G012216	1:16199107-16209301	-	3'	16199121-16199257	16199107-16199257
GRMZM2G012216	1:16199107-16209301	-	5'	16209168-16209257	16209168-16209301
GRMZM2G013248	1:284873336-284877476	-	3'	284876539-284876726	284873336-284876726
GRMZM2G013248	1:284873336-284877476	-	5'	284877052-284877186	284877052-284877476
GRMZM2G013457	1:22936909-22939515	-	5'	22939428-22939512	22939428-22939515
GRMZM2G014709	1:175920311-175928257	-	3'	175920342-175920741	175920311-175920741
GRMZM2G015005	1:251672698-251681524	+	3'	251681053-251681516	251681053-251681524
GRMZM2G015067	1:22865789-22873420	+	3'	22872765-22873266	22872765-22873420
GRMZM2G015073	1:269364409-269371226	-	3'	269364429-269364970	269364409-269364970
GRMZM2G015073	1:269364409-269371226	-	5'	269370452-269371095	269370452-269371226
GRMZM2G015097	1:171249174-171254764	+	5'	171249195-171249320	171249174-171249320
GRMZM2G015143	1:117709332-117722452	-	5'	117722177-117722274	117722177-117722452
GRMZM2G015219	1:22887707-22892482	+	3'	22892221-22892411	22892221-22892482
GRMZM2G015804	1:25704669-25711992	-	3'	25704670-25704972	25704669-25704972
GRMZM2G015925	1:219944834-219953710	+	5'	219944860-219944910	219944834-219944910
GRMZM2G016671	1:276396791-276429872	-	5'	276428493-276429710	276428493-276429872
GRMZM2G016774	1:297866340-297875858	-	3'	297866361-297866816	297866340-297866816
GRMZM2G016875	1:255314153-255322318	+	3'	255321837-255322179	255321837-255322318
GRMZM2G017047	1:255376155-255378868	+	5'	255376189-255376757	255376155-255376757
GRMZM2G017047	1:255376155-255378868	+	3'	255378716-255378865	255378716-255378868
GRMZM2G017405	1:166945684-166981533	-	3'	166945814-166946021	166945684-166946021
GRMZM2G017584	1:166937932-166941515	+	5'	166937950-166938332	166937932-166938332
GRMZM2G017792	1:43690126-43693077	-	5'	43692759-43693022	43692759-43693077
GRMZM2G018080	1:11687853-11694224	+	3'	11693677-11694219	11693677-11694224
GRMZM2G018414	1:257242396-257248987	-	3'	257246035-257246335	257242396-257246335
GRMZM2G018414	1:257242396-257248987	-	5'	257248598-257248752	257248598-257248987
GRMZM2G018678	1:52795361-52804711	-	5'	52804405-52804613	52804405-52804711
GRMZM2G018798	1:275011341-275016786	-	3'	275011431-275011610	275011341-275011610
GRMZM2G018929	1:127036087-127083244	-	3'	127036156-127036392	127036087-127036392
GRMZM2G019361	1:288142305-288149931	+	5'	288142315-288142605	288142305-288142605
GRMZM2G019361	1:288142305-288149931	+	3'	288149300-288149771	288149300-288149931
GRMZM2G019562	1:74415988-74425473	+	3'	74424843-74425248	74424843-74425473
GRMZM2G019673	1:132817359-132863383	+	5'	132817426-132817477	132817359-132817477
GRMZM2G019799	1:286428682-286437333	-	3'	286429198-286429198	286428682-286429198
GRMZM2G019799	1:286428682-286437333	-	5'	286437131-286437131	286437131-286437333
GRMZM2G019926	1:171508588-171515133	+	5'	171508696-171509214	171508588-171509214
GRMZM2G019991	1:55147001-55155210	-	5'	55154966-55155126	55154966-55155210
GRMZM2G020548	1:7034225-7040198	+	5'	7034342-7034458	7034225-7034458
GRMZM2G020548	1:7034225-7040198	+	3'	7038654-7040091	7038654-7040198
GRMZM2G020553	1:242085463-242116284	+	3'	242115912-242116273	242115912-242116284
GRMZM2G020620	1:107461590-107464463	-	3'	107461665-107461884	107461590-107461884
GRMZM2G021074	1:208211934-208216214	-	5'	208215746-208215873	208215746-208216214
GRMZM2G022061	1:68883844-68889965	+	5'	68883873-68884199	68883844-68884199
GRMZM2G022061	1:68883844-68889965	+	3'	68889651-68889949	68889651-68889965
GRMZM2G022365	1:175322304-175330136	-	5'	175329862-175330120	175329862-175330136
GRMZM2G022499	1:188491037-188495042	-	3'	188491207-188491437	188491037-188491437
GRMZM2G022499	1:188491037-188495042	-	5'	188494596-188494857	188494596-188495042
GRMZM2G022662	1:290210567-290233677	-	3'	290210590-290210822	290210567-290210822
GRMZM2G022787	1:267862470-267887236	+	3'	267886261-267887185	267886261-267887236
GRMZM2G022804	1:123262015-123264315	+	5'	123262020-123262187	123262015-123262187
GRMZM2G022804	1:123262015-123264315	+	3'	123262654-123263713	123262654-123264315
GRMZM2G023372	1:252016426-252026920	+	5'	252016458-252016934	252016426-252016934
GRMZM2G023591	1:182125350-182129043	-	5'	182128912-182129032	182128912-182129043
GRMZM2G023715	1:54273082-54278865	-	3'	54273153-54273401	54273082-54273401
GRMZM2G023884	1:54266096-54269412	+	3'	54269216-54269327	54269216-54269412
GRMZM2G023906	1:182102052-182120905	+	5'	182102172-182102320	182102052-182102320
GRMZM2G024231	1:277659611-277669574	+	3'	277669126-277669564	277669126-277669574
GRMZM2G024267	1:298398819-298407518	-	3'	298398842-298399096	298398819-298399096
GRMZM2G024267	1:298398819-298407518	-	5'	298407395-298407509	298407395-298407518
GRMZM2G024389	1:298396479-298398698	-	5'	298398508-298398559	298398508-298398698
GRMZM2G024705	1:244817457-244818566	-	3'	244817584-244817584	244817457-244817584
GRMZM2G025123	1:28597124-28610015	+	5'	28597133-28597254	28597124-28597254
GRMZM2G025488	1:205727895-205738092	+	5'	205727961-205728370	205727895-205728370
GRMZM2G025488	1:205727895-205738092	+	3'	205737582-205738069	205737582-205738092
GRMZM2G027462	1:230428704-230434462	+	3'	230434044-230434399	230434044-230434462
GRMZM2G027821	1:11979756-11984789	+	5'	11979866-11980087	11979756-11980087
GRMZM2G027991	1:250923539-250927895	+	5'	250923675-250923769	250923539-250923769
GRMZM2G027991	1:250923539-250927895	+	3'	250927113-250927284	250927113-250927895
GRMZM2G028132	1:55739485-55762535	-	5'	55761910-55762531	55761910-55762535
GRMZM2G028914	1:77567949-77591386	-	5'	77590965-77591139	77590965-77591386
GRMZM2G029396	1:290074090-290082929	+	5'	290074104-290074284	290074090-290074284
GRMZM2G029519	1:125380043-125403248	-	5'	125403056-125403247	125403056-125403248
GRMZM2G030272	1:52917424-52918897	-	3'	52917450-52917666	52917424-52917666
GRMZM2G030272	1:52917424-52918897	-	5'	52918638-52918870	52918638-52918897
GRMZM2G030422	1:35244512-35255578	-	3'	35244552-35244873	35244512-35244873
GRMZM2G030422	1:35244512-35255578	-	5'	35255422-35255551	35255422-35255578
GRMZM2G030494	1:196372539-196374313	-	5'	196374066-196374182	196374066-196374313
GRMZM2G030529	1:82020718-82030263	+	5'	82020741-82021169	82020718-82021169
GRMZM2G030567	1:3731106-3736275	+	5'	3731285-3731392	3731106-3731392
GRMZM2G030567	1:3731106-3736275	+	3'	3736130-3736202	3736130-3736275
GRMZM2G030594	1:199302834-199310810	+	5'	199302928-199302967	199302834-199302967
GRMZM2G030594	1:199302834-199310810	+	3'	199310251-199310553	199310251-199310810
GRMZM2G031022	1:264615781-264618912	-	3'	264615783-264616071	264615781-264616071
GRMZM2G031138	1:278088968-278093756	+	3'	278093473-278093752	278093473-278093756
GRMZM2G031169	1:199766892-199772458	-	5'	199772382-199772454	199772382-199772458
GRMZM2G031523	1:292353805-292358239	-	3'	292353817-292354240	292353805-292354240
GRMZM2G031572	1:224300528-224309299	-	3'	224300812-224301294	224300528-224301294
GRMZM2G031718	1:12948018-12975008	+	5'	12948077-12948462	12948018-12948462
GRMZM2G031859	1:6236635-6246257	-	3'	6236638-6236972	6236635-6236972
GRMZM2G031859	1:6236635-6246257	-	5'	6246101-6246244	6246101-6246257
GRMZM2G032222	1:223745888-223752961	-	3'	223745977-223746415	223745888-223746415
GRMZM2G032351	1:220359571-220392232	-	3'	220359597-220359873	220359571-220359873
GRMZM2G032351	1:220359571-220392232	-	5'	220391746-220392126	220391746-220392232
GRMZM2G032409	1:6213701-6218397	-	3'	6213706-6213949	6213701-6213949
GRMZM2G032821	1:75404187-75433224	+	3'	75432618-75433185	75432618-75433224
GRMZM2G032962	1:277206159-277218025	+	3'	277217556-277217953	277217556-277218025
GRMZM2G033135	1:274304067-274334426	+	3'	274333494-274334366	274333494-274334426
GRMZM2G033478	1:90554153-90566318	-	3'	90554212-90554545	90554153-90554545
GRMZM2G033478	1:90554153-90566318	-	5'	90565985-90566121	90565985-90566318
GRMZM2G033876	1:99852856-99859765	+	3'	99859218-99859703	99859218-99859765
GRMZM2G034217	1:247924596-247929682	+	3'	247927825-247928127	247927825-247929682
GRMZM2G034503	1:246874094-246877650	+	5'	246874097-246874534	246874094-246874534
GRMZM2G034503	1:246874094-246877650	+	3'	246875151-246876241	246875151-246877650
GRMZM2G035128	1:15103258-15105563	-	3'	15104421-15104714	15103258-15104714
GRMZM2G035444	1:172916494-172918175	-	3'	172916501-172916871	172916494-172916871
GRMZM2G035444	1:172916494-172918175	-	5'	172917973-172918036	172917973-172918175
GRMZM2G035461	1:33887906-33895312	-	3'	33887967-33888158	33887906-33888158
GRMZM2G035461	1:33887906-33895312	-	5'	33895059-33895308	33895059-33895312
GRMZM2G035594	1:241415584-241430935	+	5'	241415585-241415680	241415584-241415680
GRMZM2G036543	1:74274657-74287215	-	3'	74274795-74274893	74274657-74274893
GRMZM2G036640	1:264587352-264590099	-	3'	264587456-264587826	264587352-264587826
GRMZM2G036640	1:264587352-264590099	-	5'	264589452-264589878	264589452-264590099
GRMZM2G037265	1:183584765-183591641	+	5'	183584834-183585504	183584765-183585504
GRMZM2G037630	1:71582838-71595927	+	3'	71595345-71595809	71595345-71595927
GRMZM2G037650	1:207220906-207227136	+	5'	207220915-207221131	207220906-207221131
GRMZM2G037650	1:207220906-207227136	+	3'	207226064-207226619	207226064-207227136
GRMZM2G038153	1:61014804-61021281	+	5'	61014839-61014857	61014804-61014857
GRMZM2G038485	1:10086892-10088170	+	3'	10087827-10088127	10087827-10088170
GRMZM2G038893	1:166818060-166825031	+	3'	166824765-166824936	166824765-166825031
GRMZM2G038982	1:12306484-12314481	+	5'	12306749-12306749	12306484-12306749
GRMZM2G038982	1:12306484-12314481	+	3'	12313947-12314352	12313947-12314481
GRMZM2G038988	1:250245383-250261211	+	3'	250260728-250261082	250260728-250261211
GRMZM2G039186	1:162423767-162438475	+	5'	162423806-162423886	162423767-162423886
GRMZM2G039214	1:145408401-145426939	-	5'	145426792-145426903	145426792-145426939
GRMZM2G039592	1:288924643-288926288	+	3'	288926094-288926264	288926094-288926288
GRMZM2G040158	1:5813925-5826565	-	3'	5813938-5814402	5813925-5814402
GRMZM2G040158	1:5813925-5826565	-	5'	5826251-5826524	5826251-5826565
GRMZM2G040326	1:241021490-241060638	-	3'	241021500-241021767	241021490-241021767
GRMZM2G040561	1:27895303-27916522	+	5'	27895468-27895479	27895303-27895479
GRMZM2G040561	1:27895303-27916522	+	3'	27916237-27916476	27916237-27916522
GRMZM2G040743	1:84303766-84309435	+	3'	84308419-84309376	84308419-84309435
GRMZM2G040762	1:4598999-4608253	-	5'	4608117-4608248	4608117-4608253
GRMZM2G040887	1:7237084-7257507	+	5'	7237111-7237218	7237084-7237218
GRMZM2G040954	1:63356568-63364898	+	5'	63356585-63357127	63356568-63357127
GRMZM2G040954	1:63356568-63364898	+	3'	63364532-63364853	63364532-63364898
GRMZM2G041613	1:109394537-109444547	+	5'	109394550-109394707	109394537-109394707
GRMZM2G041613	1:109394537-109444547	+	3'	109444170-109444450	109444170-109444547
GRMZM2G041770	1:267015240-267020863	-	3'	267015245-267015920	267015240-267015920
GRMZM2G041770	1:267015240-267020863	-	5'	267020366-267020824	267020366-267020863
GRMZM2G041797	1:195919102-195923423	+	3'	195922903-195923409	195922903-195923423
GRMZM2G041899	1:9117737-9120854	+	3'	9120290-9120290	9120290-9120854
GRMZM2G042074	1:58050374-58061793	-	3'	58050448-58050993	58050374-58050993
GRMZM2G042074	1:58050374-58061793	-	5'	58061618-58061684	58061618-58061793
GRMZM2G042171	1:24581872-24587404	+	5'	24581897-24582121	24581872-24582121
GRMZM2G042250	1:2791432-2798512	+	5'	2791599-2791652	2791432-2791652
GRMZM2G042253	1:33475440-33479513	-	3'	33475624-33475887	33475440-33475887
GRMZM2G042615	1:53337677-53343820	-	5'	53343391-53343628	53343391-53343820
GRMZM2G042881	1:75150359-75154234	+	3'	75154220-75154220	75154220-75154234
GRMZM2G043346	1:63153452-63160770	-	3'	63154061-63154061	63153452-63154061
GRMZM2G043346	1:63153452-63160770	-	5'	63160430-63160476	63160430-63160770
GRMZM2G043484	1:49403047-49413152	-	3'	49403087-49403480	49403047-49403480
GRMZM2G043484	1:49403047-49413152	-	5'	49413013-49413070	49413013-49413152
GRMZM2G043857	1:41432455-41436147	+	3'	41435133-41435979	41435133-41436147
GRMZM2G044354	1:147355373-147364963	-	3'	147355375-147355797	147355373-147355797
GRMZM2G044481	1:79710297-79714973	+	3'	79714739-79714961	79714739-79714973
GRMZM2G045027	1:225408047-225412272	-	3'	225408071-225408265	225408047-225408265
GRMZM2G045314	1:258058680-258065670	-	5'	258065339-258065662	258065339-258065670
GRMZM2G045401	1:196626955-196630224	+	5'	196627003-196627210	196626955-196627210
GRMZM2G045688	1:220253217-220257751	-	3'	220253400-220254000	220253217-220254000
GRMZM2G045699	1:228324013-228334915	-	3'	228324146-228324452	228324013-228324452
GRMZM2G045979	1:16644072-16697973	-	5'	16697834-16697873	16697834-16697973
GRMZM2G046274	1:38730017-38744310	+	5'	38730267-38730586	38730017-38730586
GRMZM2G046430	1:287583624-287587675	-	3'	287585483-287585543	287583624-287585543
GRMZM2G046848	1:87303600-87309211	+	5'	87303612-87303612	87303600-87303612
GRMZM2G046848	1:87303600-87309211	+	3'	87309108-87309108	87309108-87309211
GRMZM2G046932	1:8967225-8971761	-	5'	8971571-8971750	8971571-8971761
GRMZM2G046966	1:269092257-269096453	-	3'	269092279-269092693	269092257-269092693
GRMZM2G046966	1:269092257-269096453	-	5'	269096216-269096343	269096216-269096453
GRMZM2G047038	1:270191136-270202276	+	5'	270191276-270191387	270191136-270191387
GRMZM2G047038	1:270191136-270202276	+	3'	270202041-270202265	270202041-270202276
GRMZM2G047365	1:292153600-292157269	+	5'	292153642-292153825	292153600-292153825
GRMZM2G047513	1:23961932-23966539	+	5'	23961976-23962067	23961932-23962067
GRMZM2G048140	1:161041119-161044317	+	5'	161041166-161042318	161041119-161042318
GRMZM2G048140	1:161041119-161044317	+	3'	161043571-161044235	161043571-161044317
GRMZM2G048276	1:210266117-210271284	+	3'	210270648-210271149	210270648-210271284
GRMZM2G048324	1:70432269-70436980	+	5'	70432377-70432628	70432269-70432628
GRMZM2G048434	1:230937870-230948639	-	5'	230948518-230948592	230948518-230948639
GRMZM2G048616	1:182418092-182420563	+	5'	182418108-182418408	182418092-182418408
GRMZM2G049031	1:4298972-4307400	-	3'	4299822-4300269	4298972-4300269
GRMZM2G049159	1:40143476-40147573	-	3'	40143545-40144182	40143476-40144182
GRMZM2G049159	1:40143476-40147573	-	5'	40147294-40147542	40147294-40147573
GRMZM2G049190	1:38248082-38253693	+	5'	38248197-38248691	38248082-38248691
GRMZM2G049201	1:172834697-172841332	+	5'	172834711-172834822	172834697-172834822
GRMZM2G049422	1:97157907-97161418	+	5'	97157920-97158344	97157907-97158344
GRMZM2G049687	1:289350252-289358966	-	5'	289358717-289358801	289358717-289358966
GRMZM2G049766	1:235195139-235206255	-	3'	235195207-235195499	235195139-235195499
GRMZM2G049888	1:289340593-289343846	+	3'	289343305-289343806	289343305-289343846
GRMZM2G050177	1:183697059-183707449	+	5'	183697224-183697224	183697059-183697224
GRMZM2G050536	1:185333866-185337628	-	3'	185334080-185334080	185333866-185334080
GRMZM2G050914	1:272937153-272941590	+	5'	272937164-272937166	272937153-272937166
GRMZM2G050984	1:78709326-78733973	-	3'	78709345-78709640	78709326-78709640
GRMZM2G052034	1:59578632-59582126	-	5'	59581553-59581793	59581553-59582126
GRMZM2G052206	1:59594488-59600517	-	3'	59594490-59594892	59594488-59594892
GRMZM2G052206	1:59594488-59600517	-	5'	59600313-59600500	59600313-59600517
GRMZM2G052586	1:1034670-1040270	-	5'	1039586-1040163	1039586-1040270
GRMZM2G052650	1:170866699-170871640	-	3'	170866748-170867033	170866699-170867033
GRMZM2G052650	1:170866699-170871640	-	5'	170871272-170871629	170871272-170871640
GRMZM2G053720	1:88349118-88351789	+	3'	88351615-88351781	88351615-88351789
GRMZM2G055217	1:22645670-22650411	+	5'	22646541-22646965	22645670-22646965
GRMZM2G055217	1:22645670-22650411	+	3'	22650111-22650357	22650111-22650411
GRMZM2G055992	1:189115279-189119356	-	3'	189115281-189116016	189115279-189116016
GRMZM2G056056	1:189121374-189124159	-	3'	189121621-189121693	189121374-189121693
GRMZM2G056357	1:225547250-225553630	+	5'	225547254-225547334	225547250-225547334
GRMZM2G056357	1:225547250-225553630	+	3'	225553091-225553549	225553091-225553630
GRMZM2G056373	1:49616828-49619440	-	3'	49617140-49617140	49616828-49617140
GRMZM2G056373	1:49616828-49619440	-	5'	49619384-49619406	49619384-49619440
GRMZM2G056393	1:297668170-297687512	-	3'	297668192-297668524	297668170-297668524
GRMZM2G056400	1:215657116-215662587	-	3'	215657189-215657356	215657116-215657356
GRMZM2G056645	1:275315533-275331480	-	3'	275315689-275316384	275315533-275316384
GRMZM2G056645	1:275315533-275331480	-	5'	275330924-275330924	275330924-275331480
GRMZM2G056686	1:201904892-201909743	+	5'	201904943-201905006	201904892-201905006
GRMZM2G056815	1:215040969-215044761	-	5'	215044658-215044712	215044658-215044761
GRMZM2G057466	1:103624472-103630846	+	5'	103624693-103625014	103624472-103625014
GRMZM2G057646	1:39405287-39414622	-	5'	39414463-39414612	39414463-39414622
GRMZM2G057652	1:62332058-62336283	-	3'	62332143-62332391	62332058-62332391
GRMZM2G057768	1:84681312-84684912	-	3'	84681423-84681975	84681312-84681975
GRMZM2G057768	1:84681312-84684912	-	5'	84684647-84684878	84684647-84684912
GRMZM2G057778	1:6009657-6030257	+	3'	6030032-6030032	6030032-6030257
GRMZM2G057820	1:147731703-147736541	-	3'	147731755-147732629	147731703-147732629
GRMZM2G057820	1:147731703-147736541	-	5'	147736069-147736435	147736069-147736541
GRMZM2G057935	1:277059387-277064811	-	3'	277059620-277059887	277059387-277059887
GRMZM2G057935	1:277059387-277064811	-	5'	277064147-277064623	277064147-277064811
GRMZM2G057973	1:295955949-295961379	+	3'	295960876-295961338	295960876-295961379
GRMZM2G058158	1:277041516-277051798	+	5'	277041524-277041866	277041516-277041866
GRMZM2G058158	1:277041516-277051798	+	3'	277051381-277051789	277051381-277051798
GRMZM2G058227	1:249479590-249482490	+	5'	249479638-249479850	249479590-249479850
GRMZM2G058227	1:249479590-249482490	+	3'	249482268-249482415	249482268-249482490
GRMZM2G058402	1:204728182-204739624	-	5'	204739486-204739601	204739486-204739624
GRMZM2G058496	1:285179854-285183826	-	3'	285179951-285180474	285179854-285180474
GRMZM2G058496	1:285179854-285183826	-	5'	285183531-285183824	285183531-285183826
GRMZM2G058511	1:298659036-298664592	+	3'	298663955-298664487	298663955-298664592
GRMZM2G058870	1:34669103-34678198	+	5'	34669230-34669291	34669103-34669291
GRMZM2G058870	1:34669103-34678198	+	3'	34677771-34678054	34677771-34678198
GRMZM2G059012	1:187088614-187095628	-	5'	187095595-187095595	187095595-187095628
GRMZM2G059064	1:179747288-179748158	+	3'	179747805-179747944	179747805-179748158
GRMZM2G059502	1:209172645-209174602	-	3'	209172677-209173074	209172645-209173074
GRMZM2G059502	1:209172645-209174602	-	5'	209174291-209174536	209174291-209174602
GRMZM2G060690	1:161631202-161634079	-	3'	161631259-161632197	161631202-161632197
GRMZM2G060765	1:286736871-286741320	-	3'	286737004-286737367	286736871-286737367
GRMZM2G060765	1:286736871-286741320	-	5'	286741086-286741315	286741086-286741320
GRMZM2G061096	1:31743855-31748796	+	3'	31748124-31748772	31748124-31748796
GRMZM2G061099	1:89294740-89301744	+	3'	89301433-89301702	89301433-89301744
GRMZM2G061202	1:39247493-39253361	+	5'	39247776-39248062	39247493-39248062
GRMZM2G061202	1:39247493-39253361	+	3'	39253097-39253303	39253097-39253361
GRMZM2G061624	1:61453635-61457356	-	5'	61457137-61457337	61457137-61457356
GRMZM2G061662	1:293217774-293228618	+	5'	293217775-293217881	293217774-293217881
GRMZM2G062045	1:265512992-265517086	-	3'	265513553-265513570	265512992-265513570
GRMZM2G062045	1:265512992-265517086	-	5'	265516818-265516995	265516818-265517086
GRMZM2G062210	1:3548036-3558298	-	5'	3558109-3558270	3558109-3558298
GRMZM2G062289	1:290195503-290198308	-	3'	290195782-290196296	290195503-290196296
GRMZM2G062357	1:290184460-290192213	-	5'	290192018-290192160	290192018-290192213
GRMZM2G062425	1:56225483-56227995	+	5'	56225497-56225500	56225483-56225500
GRMZM2G062458	1:91197095-91201803	+	5'	91197480-91197480	91197095-91197480
GRMZM2G062724	1:10027911-10032270	+	3'	10031817-10032255	10031817-10032270
GRMZM2G062777	1:158344997-158351804	-	3'	158345090-158345461	158344997-158345461
GRMZM2G063291	1:262601881-262605665	+	5'	262602189-262602189	262601881-262602189
GRMZM2G063291	1:262601881-262605665	+	3'	262602770-262603474	262602770-262605665
GRMZM2G063298	1:262606711-262611385	-	3'	262606827-262607039	262606711-262607039
GRMZM2G063657	1:56284570-56292258	+	5'	56285103-56285189	56284570-56285189
GRMZM2G063657	1:56284570-56292258	+	3'	56292023-56292221	56292023-56292258
GRMZM2G064466	1:82921234-82927082	+	3'	82926624-82926989	82926624-82927082
GRMZM2G064732	1:16348266-16356241	-	3'	16348267-16348552	16348266-16348552
GRMZM2G064732	1:16348266-16356241	-	5'	16355960-16356203	16355960-16356241
GRMZM2G064804	1:80065605-80093389	+	5'	80065673-80065727	80065605-80065727
GRMZM2G064804	1:80065605-80093389	+	3'	80092865-80093376	80092865-80093389
GRMZM2G064841	1:21195856-21220741	+	5'	21195874-21196204	21195856-21196204
GRMZM2G065083	1:283156628-283159998	+	5'	283156653-283156707	283156628-283156707
GRMZM2G065083	1:283156628-283159998	+	3'	283158903-283159112	283158903-283159998
GRMZM2G065214	1:283159014-283162339	-	3'	283159546-283159546	283159014-283159546
GRMZM2G065635	1:30536285-30542961	-	5'	30542401-30542652	30542401-30542961
GRMZM2G066120	1:37470713-37476121	-	3'	37470728-37471025	37470713-37471025
GRMZM2G066234	1:253340353-253358280	+	5'	253340392-253340448	253340353-253340448
GRMZM2G066234	1:253340353-253358280	+	3'	253357903-253358260	253357903-253358280
GRMZM2G066369	1:81649132-81651224	+	5'	81649181-81649231	81649132-81649231
GRMZM2G066801	1:252863792-252877078	+	5'	252863858-252864114	252863792-252864114
GRMZM2G067067	1:212238673-212243377	-	3'	212238675-212238937	212238673-212238937
GRMZM2G067162	1:179671915-179674260	-	5'	179673979-179674258	179673979-179674260
GRMZM2G067929	1:124824314-124828323	+	5'	124824338-124824702	124824314-124824702
GRMZM2G068024	1:258429349-258436184	-	5'	258435149-258436151	258435149-258436184
GRMZM2G068117	1:293699975-293704720	+	5'	293700005-293700341	293699975-293700341
GRMZM2G068179	1:282809755-282817395	-	5'	282817077-282817190	282817077-282817395
GRMZM2G068259	1:262219645-262230426	+	3'	262228519-262230412	262228519-262230426
GRMZM2G068443	1:293724075-293726469	+	5'	293724180-293724246	293724075-293724246
GRMZM2G068443	1:293724075-293726469	+	3'	293726147-293726464	293726147-293726469
GRMZM2G068639	1:222356400-222379784	-	3'	222356423-222356662	222356400-222356662
GRMZM2G069476	1:196458667-196463597	-	3'	196458677-196459740	196458667-196459740
GRMZM2G069476	1:196458667-196463597	-	5'	196463105-196463468	196463105-196463597
GRMZM2G069976	1:230860632-230873607	-	5'	230873312-230873366	230873312-230873607
GRMZM2G070252	1:253566006-253570953	-	5'	253570729-253570909	253570729-253570953
GRMZM2G070323	1:250489342-250504178	+	5'	250489394-250489781	250489342-250489781
GRMZM2G071025	1:270317887-270325104	+	5'	270318386-270318601	270317887-270318601
GRMZM2G071172	1:88009728-88014920	+	5'	88009884-88010050	88009728-88010050
GRMZM2G071172	1:88009728-88014920	+	3'	88013828-88014902	88013828-88014920
GRMZM2G071304	1:229127511-229135038	+	5'	229127579-229127605	229127511-229127605
GRMZM2G071304	1:229127511-229135038	+	3'	229134326-229134479	229134326-229135038
GRMZM2G071413	1:180838879-180842619	+	5'	180839220-180839220	180838879-180839220
GRMZM2G071413	1:180838879-180842619	+	3'	180839711-180839887	180839711-180842619
GRMZM2G071688	1:70582468-70585561	+	3'	70584679-70585521	70584679-70585561
GRMZM2G071987	1:172207302-172209301	-	5'	172209084-172209234	172209084-172209301
GRMZM2G072041	1:30891509-30895220	+	5'	30891547-30891650	30891509-30891650
GRMZM2G072041	1:30891509-30895220	+	3'	30895033-30895201	30895033-30895220
GRMZM2G072088	1:30909399-30919624	-	3'	30909402-30909592	30909399-30909592
GRMZM2G072156	1:289130814-289138634	+	3'	289138212-289138501	289138212-289138634
GRMZM2G072682	1:280897074-280901182	+	3'	280900722-280901072	280900722-280901182
GRMZM2G072892	1:55570470-55576860	-	5'	55576697-55576851	55576697-55576860
GRMZM2G073399	1:223088913-223099956	-	5'	223099756-223099932	223099756-223099956
GRMZM2G073427	1:170592686-170597624	+	5'	170592733-170593037	170592686-170593037
GRMZM2G073427	1:170592686-170597624	+	3'	170596005-170597621	170596005-170597624
GRMZM2G073754	1:271633671-271636741	+	3'	271636198-271636674	271636198-271636741
GRMZM2G073988	1:210444032-210455500	+	5'	210444102-210444145	210444032-210444145
GRMZM2G074193	1:248910288-248914325	-	5'	248913935-248914268	248913935-248914325
GRMZM2G074254	1:248907783-248913968	+	5'	248907819-248907949	248907783-248907949
GRMZM2G074317	1:278418871-278425448	+	5'	278418921-278419106	278418871-278419106
GRMZM2G074401	1:44805336-44808260	-	3'	44805347-44805625	44805336-44805625
GRMZM2G074899	1:247484670-247509429	+	5'	247484753-247485032	247484670-247485032
GRMZM2G074899	1:247484670-247509429	+	3'	247509155-247509421	247509155-247509429
GRMZM2G075502	1:58474500-58476590	-	5'	58476477-58476584	58476477-58476590
GRMZM2G076911	1:157150444-157155392	-	3'	157150468-157150736	157150444-157150736
GRMZM2G076911	1:157150444-157155392	-	5'	157155271-157155390	157155271-157155392
GRMZM2G077068	1:221288785-221295258	-	3'	221288944-221289340	221288785-221289340
GRMZM2G077131	1:255041381-255044489	+	5'	255041421-255041446	255041381-255041446
GRMZM2G077181	1:291025031-291029634	-	3'	291025126-291025466	291025031-291025466
GRMZM2G077181	1:291025031-291029634	-	5'	291029050-291029456	291029050-291029634
GRMZM2G077183	1:300547045-300550615	-	5'	300550476-300550581	300550476-300550615
GRMZM2G077316	1:76740093-76741716	-	3'	76740125-76740459	76740093-76740459
GRMZM2G077596	1:300501780-300516583	+	5'	300501801-300502045	300501780-300502045
GRMZM2G077757	1:144967705-144983407	+	5'	144967722-144967792	144967705-144967792
GRMZM2G077757	1:144967705-144983407	+	3'	144983207-144983399	144983207-144983407
GRMZM2G077960	1:68562626-68568930	+	5'	68562703-68563192	68562626-68563192
GRMZM2G078200	1:287959555-287963927	+	3'	287963587-287963914	287963587-287963927
GRMZM2G078412	1:221032071-221044339	-	3'	221032166-221032417	221032071-221032417
GRMZM2G078412	1:221032071-221044339	-	5'	221044216-221044222	221044216-221044339
GRMZM2G078416	1:275735489-275744188	+	5'	275735516-275735669	275735489-275735669
GRMZM2G078569	1:211664462-211672002	+	3'	211671623-211671998	211671623-211672002
GRMZM2G078806	1:66018616-66022804	-	3'	66018642-66018980	66018616-66018980
GRMZM2G079031	1:93500234-93515085	+	5'	93500265-93500583	93500234-93500583
GRMZM2G079112	1:38448130-38451303	+	5'	38448149-38448346	38448130-38448346
GRMZM2G079428	1:229910563-229926888	-	3'	229910587-229911141	229910563-229911141
GRMZM2G079823	1:26198047-26204511	+	5'	26198119-26198273	26198047-26198273
GRMZM2G079850	1:263189852-263208803	+	3'	263208580-263208796	263208580-263208803
GRMZM2G079889	1:31431410-31436527	-	5'	31436192-31436522	31436192-31436527
GRMZM2G079891	1:1855430-1858425	-	3'	1855720-1856106	1855430-1856106
GRMZM2G079891	1:1855430-1858425	-	5'	1858058-1858341	1858058-1858425
GRMZM2G080524	1:16369527-16372118	-	3'	16369533-16369654	16369527-16369654
GRMZM2G080524	1:16369527-16372118	-	5'	16371880-16372061	16371880-16372118
GRMZM2G080565	1:195808671-195812965	+	5'	195808676-195808936	195808671-195808936
GRMZM2G080746	1:184015846-184023949	-	5'	184023682-184023922	184023682-184023949
GRMZM2G080775	1:184023832-184036761	+	5'	184024118-184024282	184023832-184024282
GRMZM2G080775	1:184023832-184036761	+	3'	184036335-184036754	184036335-184036761
GRMZM2G081554	1:241277158-241285679	+	5'	241277428-241277428	241277158-241277428
GRMZM2G081915	1:255144222-255147586	+	5'	255144263-255144691	255144222-255144691
GRMZM2G082174	1:213702115-213711167	-	3'	213702204-213702908	213702115-213702908
GRMZM2G082346	1:61946686-61950156	-	3'	61947138-61947490	61946686-61947490
GRMZM2G082346	1:61946686-61950156	-	5'	61949412-61949714	61949412-61950156
GRMZM2G082484	1:224508689-224512076	-	3'	224508802-224509178	224508689-224509178
GRMZM2G082484	1:224508689-224512076	-	5'	224511811-224512075	224511811-224512076
GRMZM2G082529	1:227894379-227900123	+	5'	227894411-227894506	227894379-227894506
GRMZM2G082633	1:272621602-272623651	-	5'	272623295-272623295	272623295-272623651
GRMZM2G082640	1:200434656-200444930	+	5'	200434717-200434893	200434656-200434893
GRMZM2G083091	1:245041315-245046073	-	3'	245041337-245041521	245041315-245041521
GRMZM2G083755	1:187375269-187378490	+	5'	187375279-187375577	187375269-187375577
GRMZM2G083783	1:260678386-260682718	-	3'	260678441-260679083	260678386-260679083
GRMZM2G083783	1:260678386-260682718	-	5'	260682573-260682715	260682573-260682718
GRMZM2G083964	1:298942390-298960984	+	5'	298942487-298942588	298942390-298942588
GRMZM2G084407	1:64153841-64156416	+	5'	64153930-64154052	64153841-64154052
GRMZM2G084407	1:64153841-64156416	+	3'	64156112-64156410	64156112-64156416
GRMZM2G084486	1:245846213-245850916	-	3'	245846329-245846329	245846213-245846329
GRMZM2G084486	1:245846213-245850916	-	5'	245850372-245850372	245850372-245850916
GRMZM2G084540	1:65226277-65231901	-	3'	65226637-65228440	65226277-65228440
GRMZM2G084540	1:65226277-65231901	-	5'	65231699-65231842	65231699-65231901
GRMZM2G084825	1:110955382-110958937	+	5'	110955450-110955508	110955382-110955508
GRMZM2G084825	1:110955382-110958937	+	3'	110958815-110958921	110958815-110958937
GRMZM2G084940	1:51316436-51326661	-	5'	51326512-51326657	51326512-51326661
GRMZM2G085189	1:281230557-281234574	+	3'	281234139-281234525	281234139-281234574
GRMZM2G085427	1:32374092-32382033	-	3'	32374231-32374233	32374092-32374233
GRMZM2G085691	1:2683744-2690315	+	5'	2683790-2684195	2683744-2684195
GRMZM2G085691	1:2683744-2690315	+	3'	2689983-2690223	2689983-2690315
GRMZM2G085825	1:69094305-69098588	+	3'	69097554-69097980	69097554-69098588
GRMZM2G085827	1:2725597-2734211	+	5'	2725603-2725912	2725597-2725912
GRMZM2G085872	1:2734466-2739283	-	3'	2734521-2734969	2734466-2734969
GRMZM2G085872	1:2734466-2739283	-	5'	2739053-2739053	2739053-2739283
GRMZM2G085974	1:231217299-231219285	-	5'	231219010-231219165	231219010-231219285
GRMZM2G086072	1:11479826-11487112	+	5'	11479832-11479972	11479826-11479972
GRMZM2G086093	1:10380358-10430910	+	3'	10430433-10430904	10430433-10430910
GRMZM2G086123	1:203755856-203759758	+	3'	203759244-203759735	203759244-203759758
GRMZM2G086269	1:2750705-2753578	+	3'	2753265-2753499	2753265-2753578
GRMZM2G086285	1:181910864-181918768	+	5'	181910926-181911180	181910864-181911180
GRMZM2G086604	1:21524410-21542830	-	5'	21542411-21542754	21542411-21542830
GRMZM2G086869	1:96691145-96693208	-	3'	96691231-96691676	96691145-96691676
GRMZM2G086869	1:96691145-96693208	-	5'	96692570-96693175	96692570-96693208
GRMZM2G086992	1:74611217-74615818	+	5'	74611325-74611823	74611217-74611823
GRMZM2G086992	1:74611217-74615818	+	3'	74615283-74615774	74615283-74615818
GRMZM2G087016	1:128499713-128501256	+	5'	128499735-128499736	128499713-128499736
GRMZM2G087016	1:128499713-128501256	+	3'	128500437-128500473	128500437-128501256
GRMZM2G087161	1:45511047-45514864	+	5'	45511139-45511185	45511047-45511185
GRMZM2G087161	1:45511047-45514864	+	3'	45514610-45514740	45514610-45514864
GRMZM2G087291	1:232533255-232537778	-	5'	232537510-232537631	232537510-232537778
GRMZM2G087753	1:291962482-291969780	+	5'	291962581-291962581	291962482-291962581
GRMZM2G087918	1:10220516-10229909	+	5'	10220690-10220825	10220516-10220825
GRMZM2G088083	1:259576366-259582374	+	5'	259576372-259576473	259576366-259576473
GRMZM2G088375	1:174319534-174326028	+	5'	174319588-174320010	174319534-174320010
GRMZM2G088375	1:174319534-174326028	+	3'	174325569-174326026	174325569-174326028
GRMZM2G088482	1:3658161-3661127	-	3'	3658217-3658563	3658161-3658563
GRMZM2G088613	1:166076677-166081866	+	5'	166076724-166076724	166076677-166076724
GRMZM2G088843	1:29741922-29766989	+	5'	29741944-29742105	29741922-29742105
GRMZM2G089092	1:6922162-6925591	-	5'	6925489-6925587	6925489-6925591
GRMZM2G089631	1:214513709-214536464	-	5'	214536054-214536331	214536054-214536464
GRMZM2G090018	1:67733452-67736094	+	5'	67733475-67733536	67733452-67733536
GRMZM2G090217	1:251873218-251887931	-	3'	251873300-251873542	251873218-251873542
GRMZM2G090217	1:251873218-251887931	-	5'	251887713-251887770	251887713-251887931
GRMZM2G090542	1:217073931-217111694	+	5'	217073963-217074086	217073931-217074086
GRMZM2G090542	1:217073931-217111694	+	3'	217111403-217111687	217111403-217111694
GRMZM2G090657	1:157976308-157977271	+	5'	157976425-157976738	157976308-157976738
GRMZM2G090887	1:113883585-113889273	+	3'	113888535-113889208	113888535-113889273
GRMZM2G092433	1:259592096-259598699	+	5'	259592108-259592330	259592096-259592330
GRMZM2G092433	1:259592096-259598699	+	3'	259598330-259598684	259598330-259598699
GRMZM2G092481	1:7954223-7964692	-	5'	7964588-7964689	7964588-7964692
GRMZM2G092595	1:215252063-215259670	+	3'	215259081-215259644	215259081-215259670
GRMZM2G092652	1:154521859-154534240	-	5'	154534164-154534227	154534164-154534240
GRMZM2G093020	1:143352528-143354387	+	3'	143354149-143354301	143354149-143354387
GRMZM2G093776	1:293531158-293535733	-	5'	293535465-293535465	293535465-293535733
GRMZM2G093809	1:180005619-180009342	-	3'	180006011-180006011	180005619-180006011
GRMZM2G094168	1:98770498-98772473	+	3'	98771760-98772402	98771760-98772473
GRMZM2G094698	1:262785036-262791083	-	3'	262785068-262785585	262785036-262785585
GRMZM2G094988	1:236504849-236510980	+	3'	236510360-236510971	236510360-236510980
GRMZM2G095020	1:84614367-84620113	+	5'	84614513-84614624	84614367-84614624
GRMZM2G095043	1:47135044-47140313	+	3'	47140039-47140259	47140039-47140313
GRMZM2G095931	1:215494540-215499138	-	3'	215494635-215494759	215494540-215494759
GRMZM2G095931	1:215494540-215499138	-	5'	215498954-215499049	215498954-215499138
GRMZM2G096231	1:41243683-41249996	-	3'	41243728-41243910	41243683-41243910
GRMZM2G096682	1:72710183-72713376	+	5'	72710256-72710488	72710183-72710488
GRMZM2G096806	1:192437196-192441937	-	5'	192441780-192441780	192441780-192441937
GRMZM2G097164	1:263265598-263269112	-	5'	263268933-263269102	263268933-263269112
GRMZM2G097249	1:83790509-83797555	-	3'	83790524-83790823	83790509-83790823
GRMZM2G097249	1:83790509-83797555	-	5'	83797093-83797094	83797093-83797555
GRMZM2G097404	1:92356331-92358647	-	3'	92356350-92356773	92356331-92356773
GRMZM2G097426	1:65623034-65627202	+	5'	65624125-65624162	65623034-65624162
GRMZM2G097434	1:17240261-17260005	+	5'	17240329-17240805	17240261-17240805
GRMZM2G097640	1:233885120-233892876	-	3'	233885155-233885728	233885120-233885728
GRMZM2G097640	1:233885120-233892876	-	5'	233892671-233892825	233892671-233892876
GRMZM2G098084	1:254463640-254467264	-	3'	254463715-254464415	254463640-254464415
GRMZM2G098494	1:180962524-180980705	-	3'	180962581-180962720	180962524-180962720
GRMZM2G098494	1:180962524-180980705	-	5'	180980340-180980529	180980340-180980705
GRMZM2G099305	1:279963682-279966783	+	5'	279963848-279964538	279963682-279964538
GRMZM2G099305	1:279963682-279966783	+	3'	279966355-279966746	279966355-279966783
GRMZM2G099319	1:179613909-179618431	+	3'	179618033-179618197	179618033-179618431
GRMZM2G099367	1:221423337-221455741	-	5'	221455530-221455712	221455530-221455741
GRMZM2G099454	1:7398260-7402945	+	5'	7398292-7398309	7398260-7398309
GRMZM2G099542	1:174400532-174407106	-	3'	174400918-174401218	174400532-174401218
GRMZM2G099542	1:174400532-174407106	-	5'	174406993-174407031	174406993-174407106
GRMZM2G099797	1:28417637-28422778	+	5'	28417831-28418055	28417637-28418055
GRMZM2G099907	1:276483747-276490317	+	5'	276483810-276483869	276483747-276483869
GRMZM2G100448	1:256749681-256757303	-	3'	256749698-256750399	256749681-256750399
GRMZM2G100497	1:65736865-65747703	+	5'	65736891-65736927	65736865-65736927
GRMZM2G100920	1:298050598-298057337	-	5'	298057264-298057336	298057264-298057337
GRMZM2G101000	1:215958211-215960531	+	3'	215960065-215960443	215960065-215960531
GRMZM2G101105	1:220828686-220832117	+	5'	220828757-220828967	220828686-220828967
GRMZM2G101105	1:220828686-220832117	+	3'	220831344-220832113	220831344-220832117
GRMZM2G101245	1:208322940-208325521	+	3'	208325245-208325510	208325245-208325521
GRMZM2G101460	1:272036255-272053468	-	3'	272036273-272037232	272036255-272037232
GRMZM2G101689	1:60863937-60868246	+	5'	60863958-60864099	60863937-60864099
GRMZM2G101744	1:60869402-60872869	-	5'	60872346-60872580	60872346-60872869
GRMZM2G101856	1:262177572-262186573	+	3'	262186099-262186161	262186099-262186573
GRMZM2G102497	1:61138600-61142291	+	3'	61141932-61142287	61141932-61142291
GRMZM2G103079	1:25818852-25828516	+	3'	25827658-25828346	25827658-25828516
GRMZM2G103197	1:204480597-204482062	-	3'	204480669-204480749	204480597-204480749
GRMZM2G103197	1:204480597-204482062	-	5'	204481648-204481910	204481648-204482062
GRMZM2G103599	1:9485934-9568040	+	5'	9486103-9486183	9485934-9486183
GRMZM2G103610	1:251216653-251220037	+	5'	251216711-251217450	251216653-251217450
GRMZM2G103610	1:251216653-251220037	+	3'	251219687-251219831	251219687-251220037
GRMZM2G103773	1:249371866-249376519	+	5'	249371977-249372118	249371866-249372118
GRMZM2G103773	1:249371866-249376519	+	3'	249375952-249376239	249375952-249376519
GRMZM2G103843	1:249377781-249385951	+	5'	249378686-249379461	249377781-249379461
GRMZM2G103843	1:249377781-249385951	+	3'	249385561-249385561	249385561-249385951
GRMZM2G104012	1:228456714-228462479	+	5'	228457083-228457107	228456714-228457107
GRMZM2G104125	1:291003178-291007975	+	5'	291003373-291003655	291003178-291003655
GRMZM2G104255	1:32404934-32408278	+	5'	32406853-32406862	32404934-32406862
GRMZM2G104501	1:261017585-261033725	-	5'	261033262-261033262	261033262-261033725
GRMZM2G105321	1:298298697-298300201	+	5'	298298817-298299396	298298697-298299396
GRMZM2G105321	1:298298697-298300201	+	3'	298299981-298300151	298299981-298300201
GRMZM2G105362	1:36977436-36979496	+	5'	36977518-36977640	36977436-36977640
GRMZM2G105415	1:4709091-4714598	+	5'	4709171-4709208	4709091-4709208
GRMZM2G105415	1:4709091-4714598	+	3'	4714102-4714557	4714102-4714598
GRMZM2G106017	1:18432272-18440356	+	5'	18432278-18432500	18432272-18432500
GRMZM2G106574	1:210806880-210836752	-	5'	210836617-210836742	210836617-210836752
GRMZM2G107120	1:257996871-258015109	+	3'	258014028-258014201	258014028-258015109
GRMZM2G107463	1:53171372-53176203	-	5'	53176023-53176168	53176023-53176203
GRMZM2G107481	1:53148294-53162622	-	5'	53162321-53162433	53162321-53162622
GRMZM2G107571	1:231768961-231790970	-	3'	231769022-231769554	231768961-231769554
GRMZM2G107575	1:94993910-94998653	+	5'	94993988-94994498	94993910-94994498
GRMZM2G107629	1:231759993-231766238	-	5'	231766056-231766222	231766056-231766238
GRMZM2G107741	1:88896254-88908810	-	5'	88908593-88908802	88908593-88908810
GRMZM2G107774	1:25392612-25395149	-	3'	25392624-25393076	25392612-25393076
GRMZM2G107798	1:280541178-280571704	-	5'	280571358-280571672	280571358-280571704
GRMZM2G107805	1:25396138-25399041	+	5'	25396169-25396315	25396138-25396315
GRMZM2G107818	1:280572041-280574601	-	3'	280573720-280573937	280572041-280573937
GRMZM2G107818	1:280572041-280574601	-	5'	280574161-280574586	280574161-280574601
GRMZM2G107854	1:25414153-25421319	-	3'	25414293-25414863	25414153-25414863
GRMZM2G107854	1:25414153-25421319	-	5'	25420953-25421304	25420953-25421319
GRMZM2G108008	1:211248233-211252015	-	5'	211251774-211252003	211251774-211252015
GRMZM2G108138	1:33116018-33123331	+	5'	33116139-33116285	33116018-33116285
GRMZM2G108416	1:62434950-62454970	-	5'	62454636-62454927	62454636-62454970
GRMZM2G108463	1:243826513-243842402	+	5'	243826570-243826925	243826513-243826925
GRMZM2G109201	1:63036961-63041504	-	3'	63037209-63037379	63036961-63037379
GRMZM2G109201	1:63036961-63041504	-	5'	63041251-63041251	63041251-63041504
GRMZM2G109221	1:63011468-63035797	-	5'	63035476-63035768	63035476-63035797
GRMZM2G109509	1:7079807-7085830	-	5'	7085702-7085736	7085702-7085830
GRMZM2G109566	1:7069663-7074044	+	3'	7073351-7073822	7073351-7074044
GRMZM2G109725	1:2205739-2210356	-	3'	2205748-2206187	2205739-2206187
GRMZM2G109885	1:39852666-39860136	+	5'	39852701-39852868	39852666-39852868
GRMZM2G109967	1:43233845-43241250	-	5'	43241098-43241183	43241098-43241250
GRMZM2G110004	1:33836584-33845032	+	5'	33836635-33836730	33836584-33836730
GRMZM2G110004	1:33836584-33845032	+	3'	33838664-33839062	33838664-33845032
GRMZM2G110143	1:182564577-182568418	-	3'	182564660-182565002	182564577-182565002
GRMZM2G110143	1:182564577-182568418	-	5'	182568057-182568332	182568057-182568418
GRMZM2G110306	1:209569378-209585679	+	5'	209569388-209569679	209569378-209569679
GRMZM2G110345	1:7555847-7561014	+	5'	7555923-7555923	7555847-7555923
GRMZM2G110345	1:7555847-7561014	+	3'	7560789-7560929	7560789-7561014
GRMZM2G110413	1:39895414-39896731	+	5'	39895455-39895504	39895414-39895504
GRMZM2G110413	1:39895414-39896731	+	3'	39895878-39896130	39895878-39896731
GRMZM2G110847	1:21768711-21788101	-	5'	21787799-21788092	21787799-21788101
GRMZM2G111208	1:69549378-69561512	-	3'	69549380-69549646	69549378-69549646
GRMZM2G111214	1:20995899-20999146	-	5'	20998954-20999129	20998954-20999146
GRMZM2G111269	1:252986220-252990943	+	5'	252986248-252987187	252986220-252987187
GRMZM2G112672	1:253698726-253716722	-	5'	253716261-253716291	253716261-253716722
GRMZM2G113137	1:296333493-296339871	+	5'	296334073-296334259	296333493-296334259
GRMZM2G113137	1:296333493-296339871	+	3'	296339185-296339855	296339185-296339871
GRMZM2G113202	1:229251332-229267583	-	5'	229267181-229267181	229267181-229267583
GRMZM2G113351	1:17734145-17742150	+	5'	17734174-17734352	17734145-17734352
GRMZM2G113364	1:46929004-46934993	-	3'	46930301-46930337	46929004-46930337
GRMZM2G113364	1:46929004-46934993	-	5'	46934668-46934725	46934668-46934993
GRMZM2G113569	1:262874673-262882137	+	5'	262874792-262875045	262874673-262875045
GRMZM2G113726	1:183832172-183835884	-	5'	183835540-183835855	183835540-183835884
GRMZM2G113775	1:19698130-19702652	-	5'	19702165-19702555	19702165-19702652
GRMZM2G113928	1:250618589-250624109	-	5'	250623880-250624045	250623880-250624109
GRMZM2G114055	1:21756509-21777386	-	3'	21756543-21756858	21756509-21756858
GRMZM2G114184	1:21719292-21721644	+	3'	21721241-21721470	21721241-21721644
GRMZM2G114234	1:21682046-21685130	+	5'	21682194-21682242	21682046-21682242
GRMZM2G114459	1:2088488-2102367	-	3'	2088572-2088984	2088488-2088984
GRMZM2G114459	1:2088488-2102367	-	5'	2102086-2102312	2102086-2102367
GRMZM2G114772	1:92247851-92251186	+	5'	92247878-92248131	92247851-92248131
GRMZM2G114841	1:193905947-193910853	+	5'	193906297-193906433	193905947-193906433
GRMZM2G114841	1:193905947-193910853	+	3'	193910642-193910801	193910642-193910853
GRMZM2G114906	1:89250987-89255588	-	3'	89251052-89251445	89250987-89251445
GRMZM2G115105	1:17382907-17394588	+	3'	17393905-17394319	17393905-17394588
GRMZM2G115772	1:242633197-242639331	-	5'	242638761-242639210	242638761-242639331
GRMZM2G115975	1:61701368-61714473	-	3'	61701512-61701890	61701368-61701890
GRMZM2G115975	1:61701368-61714473	-	5'	61714168-61714403	61714168-61714473
GRMZM2G116010	1:61697427-61701066	+	5'	61697606-61697606	61697427-61697606
GRMZM2G116010	1:61697427-61701066	+	3'	61700618-61700868	61700618-61701066
GRMZM2G116126	1:285838437-285854629	+	5'	285838519-285838713	285838437-285838713
GRMZM2G116126	1:285838437-285854629	+	3'	285854004-285854594	285854004-285854629
GRMZM2G116526	1:234845844-234877484	-	5'	234877384-234877384	234877384-234877484
GRMZM2G116840	1:256426914-256467784	+	5'	256427015-256427134	256426914-256427134
GRMZM2G116908	1:291596746-291605162	+	5'	291596762-291597056	291596746-291597056
GRMZM2G116908	1:291596746-291605162	+	3'	291604826-291605143	291604826-291605162
GRMZM2G116971	1:216692453-216700752	+	3'	216700289-216700749	216700289-216700752
GRMZM2G117016	1:280087580-280089956	-	3'	280087752-280087833	280087580-280087833
GRMZM2G117189	1:199329608-199335709	+	3'	199335147-199335555	199335147-199335709
GRMZM2G117804	1:87448162-87459033	-	5'	87458412-87459028	87458412-87459033
GRMZM2G118062	1:296245650-296302039	+	5'	296246425-296246516	296245650-296246516
GRMZM2G118467	1:241962721-241976179	+	5'	241962723-241963133	241962721-241963133
GRMZM2G118485	1:28522823-28532254	+	3'	28529870-28530238	28529870-28532254
GRMZM2G118497	1:31059848-31064726	-	3'	31059858-31060198	31059848-31060198
GRMZM2G118497	1:31059848-31064726	-	5'	31064522-31064691	31064522-31064726
GRMZM2G119104	1:22583820-22596188	+	3'	22595298-22595788	22595298-22596188
GRMZM2G119248	1:156544863-156558588	-	3'	156545379-156545681	156544863-156545681
GRMZM2G119248	1:156544863-156558588	-	5'	156558412-156558520	156558412-156558588
GRMZM2G119252	1:152120578-152124473	-	3'	152120619-152120905	152120578-152120905
GRMZM2G119252	1:152120578-152124473	-	5'	152124105-152124438	152124105-152124473
GRMZM2G119339	1:173673209-173698672	+	5'	173673238-173673465	173673209-173673465
GRMZM2G119521	1:238809456-238811821	+	5'	238809556-238809953	238809456-238809953
GRMZM2G119657	1:227165980-227184438	-	5'	227184185-227184375	227184185-227184438
GRMZM2G119933	1:15778467-15784741	+	3'	15784222-15784692	15784222-15784741
GRMZM2G120069	1:67061215-67063237	+	5'	67061317-67061389	67061215-67061389
GRMZM2G120421	1:294819464-294822756	-	5'	294822408-294822595	294822408-294822756
GRMZM2G120587	1:68140823-68144741	-	3'	68140901-68141158	68140823-68141158
GRMZM2G120587	1:68140823-68144741	-	5'	68144658-68144676	68144658-68144741
GRMZM2G120596	1:286928913-286935504	+	5'	286928924-286929126	286928913-286929126
GRMZM2G121871	1:49719908-49724550	+	5'	49720025-49720133	49719908-49720133
GRMZM2G121871	1:49719908-49724550	+	3'	49723911-49724477	49723911-49724550
GRMZM2G121960	1:49770385-49792329	-	3'	49770451-49770840	49770385-49770840
GRMZM2G121960	1:49770385-49792329	-	5'	49792278-49792278	49792278-49792329
GRMZM2G121996	1:65490465-65494733	+	3'	65494369-65494596	65494369-65494733
GRMZM2G122064	1:207642133-207648590	-	5'	207648314-207648514	207648314-207648590
GRMZM2G122139	1:282735483-282752974	-	3'	282735519-282735784	282735483-282735784
GRMZM2G122139	1:282735483-282752974	-	5'	282752400-282752902	282752400-282752974
GRMZM2G122148	1:295140480-295143540	+	3'	295143310-295143494	295143310-295143540
GRMZM2G122787	1:11527023-11532572	-	5'	11532411-11532534	11532411-11532572
GRMZM2G122965	1:47703605-47709848	-	5'	47709630-47709758	47709630-47709848
GRMZM2G123876	1:294963281-294966931	+	5'	294963341-294963524	294963281-294963524
GRMZM2G123884	1:222654296-222656870	+	3'	222656334-222656602	222656334-222656870
GRMZM2G123900	1:154329457-154331722	+	5'	154329458-154330297	154329457-154330297
GRMZM2G123986	1:13989674-13992285	-	3'	13989676-13990195	13989674-13990195
GRMZM2G124051	1:14093516-14100524	+	5'	14093541-14093686	14093516-14093686
GRMZM2G124051	1:14093516-14100524	+	3'	14099926-14100132	14099926-14100524
GRMZM2G124209	1:53990897-54006437	-	3'	53991330-53991794	53990897-53991794
GRMZM2G124209	1:53990897-54006437	-	5'	54005990-54006372	54005990-54006437
GRMZM2G124423	1:166881046-166883501	+	5'	166881063-166881479	166881046-166881479
GRMZM2G124423	1:166881046-166883501	+	3'	166882675-166882800	166882675-166883501
GRMZM2G124532	1:50022852-50034523	+	5'	50023180-50023180	50022852-50023180
GRMZM2G124557	1:189385189-189390834	+	5'	189385226-189385760	189385189-189385760
GRMZM2G125140	1:244655939-244665058	+	5'	244656235-244656235	244655939-244656235
GRMZM2G125617	1:225187458-225196802	+	5'	225187496-225187646	225187458-225187646
GRMZM2G125762	1:243077759-243083106	-	5'	243082660-243083061	243082660-243083106
GRMZM2G126199	1:3347505-3350343	+	5'	3347715-3347799	3347505-3347799
GRMZM2G126199	1:3347505-3350343	+	3'	3349169-3349742	3349169-3350343
GRMZM2G126338	1:276138769-276144110	+	5'	276138867-276139126	276138769-276139126
GRMZM2G126808	1:29542147-29544726	-	3'	29542179-29543201	29542147-29543201
GRMZM2G126808	1:29542147-29544726	-	5'	29544379-29544587	29544379-29544726
GRMZM2G127396	1:219647327-219664574	-	3'	219647329-219647898	219647327-219647898
GRMZM2G127559	1:268401123-268406267	-	3'	268401145-268401451	268401123-268401451
GRMZM2G127559	1:268401123-268406267	-	5'	268405664-268405974	268405664-268406267
GRMZM2G127739	1:165422119-165427758	-	3'	165422830-165423173	165422119-165423173
GRMZM2G127739	1:165422119-165427758	-	5'	165427526-165427702	165427526-165427758
GRMZM2G128613	1:28070072-28079046	-	5'	28078630-28078940	28078630-28079046
GRMZM2G128641	1:105768302-105774504	-	5'	105774117-105774413	105774117-105774504
GRMZM2G128663	1:292000334-292004820	-	5'	292004469-292004696	292004469-292004820
GRMZM2G128744	1:26822318-26824722	+	3'	26824313-26824667	26824313-26824722
GRMZM2G130121	1:74627224-74640020	+	3'	74639619-74639963	74639619-74640020
GRMZM2G130897	1:236966726-236982241	-	3'	236966740-236967041	236966726-236967041
GRMZM2G131525	1:273839798-273849374	+	5'	273842906-273842906	273839798-273842906
GRMZM2G131815	1:230267924-230271087	+	5'	230268018-230268177	230267924-230268177
GRMZM2G131939	1:300951362-300963903	-	3'	300951400-300951860	300951362-300951860
GRMZM2G131939	1:300951362-300963903	-	5'	300963818-300963846	300963818-300963903
GRMZM2G132690	1:82163612-82164902	-	3'	82163654-82163852	82163612-82163852
GRMZM2G132712	1:191548449-191561264	+	3'	191560791-191561220	191560791-191561264
GRMZM2G132780	1:191533862-191547255	+	5'	191533886-191534283	191533862-191534283
GRMZM2G132971	1:287785750-287793357	+	5'	287786016-287786876	287785750-287786876
GRMZM2G133573	1:30689503-30699334	-	3'	30689603-30689795	30689503-30689795
GRMZM2G133943	1:80976073-80982319	-	3'	80976254-80976420	80976073-80976420
GRMZM2G133943	1:80976073-80982319	-	5'	80982055-80982317	80982055-80982319
GRMZM2G134976	1:260199883-260204523	-	5'	260204213-260204339	260204213-260204523
GRMZM2G134985	1:121494742-121506105	-	3'	121494809-121495390	121494742-121495390
GRMZM2G135045	1:148459813-148468007	+	5'	148459825-148459957	148459813-148459957
GRMZM2G135045	1:148459813-148468007	+	3'	148467582-148467847	148467582-148468007
GRMZM2G135617	1:194761993-194765199	+	5'	194761999-194762295	194761993-194762295
GRMZM2G135688	1:226823860-226835431	-	3'	226823936-226824130	226823860-226824130
GRMZM2G135913	1:74237734-74239870	+	5'	74237872-74238107	74237734-74238107
GRMZM2G135949	1:215813199-215816095	+	5'	215813242-215813340	215813199-215813340
GRMZM2G136113	1:14673902-14682854	-	5'	14682684-14682836	14682684-14682854
GRMZM2G136268	1:42925295-42931276	-	5'	42930789-42931255	42930789-42931276
GRMZM2G136366	1:182309883-182319564	+	5'	182310011-182310011	182309883-182310011
GRMZM2G136443	1:200655133-200664757	-	5'	200664403-200664592	200664403-200664757
GRMZM2G137236	1:3002216-3020918	+	5'	3002518-3002518	3002216-3002518
GRMZM2G137293	1:162552696-162556597	-	3'	162552721-162553771	162552696-162553771
GRMZM2G137293	1:162552696-162556597	-	5'	162556151-162556402	162556151-162556597
GRMZM2G137338	1:289407544-289415387	-	5'	289415134-289415348	289415134-289415387
GRMZM2G137788	1:268802186-268806484	-	5'	268806241-268806287	268806241-268806484
GRMZM2G137861	1:184944904-184949546	-	3'	184945148-184945148	184944904-184945148
GRMZM2G137861	1:184944904-184949546	-	5'	184949265-184949265	184949265-184949546
GRMZM2G137968	1:299489366-299498208	+	5'	299489370-299489609	299489366-299489609
GRMZM2G137968	1:299489366-299498208	+	3'	299497716-299498115	299497716-299498208
GRMZM2G139360	1:212531765-212536569	+	5'	212531824-212531901	212531765-212531901
GRMZM2G140339	1:11908025-11941728	+	5'	11908440-11908501	11908025-11908501
GRMZM2G140915	1:62702853-62705077	+	5'	62702869-62703007	62702853-62703007
GRMZM2G140991	1:28376750-28379244	+	5'	28376886-28376978	28376750-28376978
GRMZM2G141526	1:112811100-112814705	-	3'	112811149-112811279	112811100-112811279
GRMZM2G141535	1:286519501-286527477	-	5'	286527240-286527285	286527240-286527477
GRMZM2G141607	1:200043406-200046855	+	5'	200043437-200043775	200043406-200043775
GRMZM2G142249	1:216924049-216931010	+	5'	216924064-216924173	216924049-216924173
GRMZM2G142383	1:193633694-193641047	+	5'	193633769-193634280	193633694-193634280
GRMZM2G142597	1:187420786-187431101	+	3'	187429994-187430945	187429994-187431101
GRMZM2G142660	1:166731468-166736510	-	3'	166731472-166731757	166731468-166731757
GRMZM2G142938	1:10483986-10486120	-	3'	10485352-10485352	10483986-10485352
GRMZM2G143082	1:86270146-86271419	-	3'	86270165-86270505	86270146-86270505
GRMZM2G143160	1:265377515-265383155	+	5'	265377905-265377905	265377515-265377905
GRMZM2G143160	1:265377515-265383155	+	3'	265382797-265382797	265382797-265383155
GRMZM2G143202	1:86848057-86858935	+	5'	86848122-86848249	86848057-86848249
GRMZM2G143202	1:86848057-86858935	+	3'	86858311-86858514	86858311-86858935
GRMZM2G143588	1:6164241-6168780	-	5'	6168550-6168759	6168550-6168780
GRMZM2G143644	1:196334773-196339042	+	5'	196334855-196334994	196334773-196334994
GRMZM2G143644	1:196334773-196339042	+	3'	196338199-196338719	196338199-196339042
GRMZM2G143703	1:80173133-80177354	+	3'	80175051-80176373	80175051-80177354
GRMZM2G143883	1:232462370-232467550	+	3'	232467277-232467510	232467277-232467550
GRMZM2G145008	1:52761773-52766919	-	3'	52761807-52762080	52761773-52762080
GRMZM2G145008	1:52761773-52766919	-	5'	52766601-52766843	52766601-52766919
GRMZM2G145974	1:276603678-276605054	-	3'	276603845-276604067	276603678-276604067
GRMZM2G146486	1:246769151-246782631	+	5'	246769233-246769278	246769151-246769278
GRMZM2G146616	1:260576544-260580602	+	5'	260576609-260576809	260576544-260576809
GRMZM2G146994	1:244807263-244817654	+	3'	244817082-244817455	244817082-244817654
GRMZM2G147145	1:262353762-262359261	+	5'	262353778-262353987	262353762-262353987
GRMZM2G147145	1:262353762-262359261	+	3'	262358917-262359190	262358917-262359261
GRMZM2G147332	1:265474859-265500127	+	5'	265474905-265475431	265474859-265475431
GRMZM2G147346	1:231339380-231341788	+	3'	231341600-231341787	231341600-231341788
GRMZM2G147418	1:227651940-227656787	-	3'	227652272-227652427	227651940-227652427
GRMZM2G147629	1:221331244-221336808	+	5'	221331274-221331357	221331244-221331357
GRMZM2G147724	1:147025014-147028413	-	3'	147025018-147025536	147025014-147025536
GRMZM2G147849	1:273761303-273764786	-	3'	273761376-273761724	273761303-273761724
GRMZM2G147849	1:273761303-273764786	-	5'	273764506-273764703	273764506-273764786
GRMZM2G148323	1:232103827-232115859	-	3'	232103871-232104659	232103827-232104659
GRMZM2G148370	1:293343048-293351837	-	3'	293343176-293343429	293343048-293343429
GRMZM2G148370	1:293343048-293351837	-	5'	293351167-293351525	293351167-293351837
GRMZM2G148855	1:16950084-16972917	+	3'	16972668-16972668	16972668-16972917
GRMZM2G148896	1:201771718-201775671	+	5'	201771782-201772191	201771718-201772191
GRMZM2G148896	1:201771718-201775671	+	3'	201775384-201775619	201775384-201775671
GRMZM2G149038	1:31037122-31038757	-	5'	31038324-31038729	31038324-31038757
GRMZM2G149219	1:259014444-259016179	+	3'	259015688-259016110	259015688-259016179
GRMZM2G149238	1:259016716-259021894	-	3'	259016743-259017391	259016716-259017391
GRMZM2G150169	1:244564163-244590632	+	5'	244564200-244564562	244564163-244564562
GRMZM2G150772	1:256131670-256145109	+	5'	256131837-256131885	256131670-256131885
GRMZM2G150772	1:256131670-256145109	+	3'	256144298-256144986	256144298-256145109
GRMZM2G151236	1:180854373-180864917	-	5'	180864776-180864776	180864776-180864917
GRMZM2G151266	1:289921770-289944644	-	5'	289944419-289944419	289944419-289944644
GRMZM2G151955	1:211306417-211312161	+	3'	211311689-211312057	211311689-211312161
GRMZM2G152457	1:213030503-213034765	-	3'	213030529-213030974	213030503-213030974
GRMZM2G152485	1:213024757-213029433	-	3'	213024796-213025231	213024757-213025231
GRMZM2G152485	1:213024757-213029433	-	5'	213029056-213029422	213029056-213029433
GRMZM2G152877	1:66961370-66967315	-	3'	66961410-66961618	66961370-66961618
GRMZM2G152877	1:66961370-66967315	-	5'	66967119-66967126	66967119-66967315
GRMZM2G152901	1:237009964-237013940	+	5'	237010198-237010230	237009964-237010230
GRMZM2G152901	1:237009964-237013940	+	3'	237013067-237013377	237013067-237013940
GRMZM2G153594	1:138643612-138657983	-	3'	138646367-138646733	138643612-138646733
GRMZM2G153769	1:23603928-23614801	+	5'	23604057-23604246	23603928-23604246
GRMZM2G153920	1:23615288-23617384	-	3'	23615457-23615551	23615288-23615551
GRMZM2G153920	1:23615288-23617384	-	5'	23617221-23617360	23617221-23617384
GRMZM2G154124	1:206200000-206204664	-	3'	206200059-206200291	206200000-206200291
GRMZM2G154124	1:206200000-206204664	-	5'	206204433-206204623	206204433-206204664
GRMZM2G154320	1:254947126-254950953	-	5'	254950765-254950944	254950765-254950953
GRMZM2G154487	1:90234665-90239366	-	3'	90234676-90234812	90234665-90234812
GRMZM2G154883	1:43348390-43363369	+	5'	43348585-43348771	43348390-43348771
GRMZM2G154883	1:43348390-43363369	+	3'	43362446-43363368	43362446-43363369
GRMZM2G155312	1:275207652-275217333	-	5'	275217153-275217231	275217153-275217333
GRMZM2G155317	1:293129634-293133291	-	5'	293132993-293133068	293132993-293133291
GRMZM2G155753	1:210888611-210894282	+	3'	210893714-210894279	210893714-210894282
GRMZM2G155767	1:269015970-269022833	+	5'	269016266-269016277	269015970-269016277
GRMZM2G155767	1:269015970-269022833	+	3'	269022268-269022761	269022268-269022833
GRMZM2G155935	1:297380910-297384746	-	3'	297380939-297381034	297380910-297381034
GRMZM2G155980	1:297375898-297380392	+	3'	297379654-297380168	297379654-297380392
GRMZM2G156516	1:295613896-295617230	+	5'	295613903-295614044	295613896-295614044
GRMZM2G156565	1:295555161-295563828	-	5'	295563749-295563804	295563749-295563828
GRMZM2G156608	1:145853202-145881583	-	5'	145881344-145881548	145881344-145881583
GRMZM2G156756	1:295501889-295509029	+	5'	295502079-295502404	295501889-295502404
GRMZM2G156800	1:280154341-280164446	-	3'	280154384-280154802	280154341-280154802
GRMZM2G156827	1:62234035-62246901	-	5'	62246468-62246853	62246468-62246901
GRMZM2G156937	1:294714838-294726133	+	5'	294714875-294714921	294714838-294714921
GRMZM2G157010	1:200505856-200515240	-	3'	200505932-200506360	200505856-200506360
GRMZM2G157010	1:200505856-200515240	-	5'	200515141-200515174	200515141-200515240
GRMZM2G157177	1:32163767-32172639	-	3'	32163794-32164213	32163767-32164213
GRMZM2G157197	1:32158339-32162352	-	3'	32158359-32158564	32158339-32158564
GRMZM2G157197	1:32158339-32162352	-	5'	32161324-32162092	32161324-32162352
GRMZM2G158437	1:205458507-205461519	-	5'	205461195-205461501	205461195-205461519
GRMZM2G158446	1:166379138-166401644	+	3'	166401146-166401552	166401146-166401644
GRMZM2G158462	1:205454819-205457228	+	5'	205454827-205454908	205454819-205454908
GRMZM2G158676	1:57460389-57465599	+	5'	57460567-57460567	57460389-57460567
GRMZM2G158676	1:57460389-57465599	+	3'	57465057-57465588	57465057-57465599
GRMZM2G159581	1:197419107-197421526	+	5'	197419216-197419246	197419107-197419246
GRMZM2G159632	1:24403142-24410203	-	3'	24403203-24403725	24403142-24403725
GRMZM2G159992	1:107890786-107901606	-	3'	107890804-107891312	107890786-107891312
GRMZM2G159992	1:107890786-107901606	-	5'	107901292-107901599	107901292-107901606
GRMZM2G160324	1:39056941-39062459	-	3'	39056958-39057387	39056941-39057387
GRMZM2G160428	1:39064381-39071101	-	5'	39070874-39071002	39070874-39071101
GRMZM2G160752	1:229169745-229183094	-	3'	229169748-229170260	229169745-229170260
GRMZM2G160927	1:212334702-212357248	-	5'	212351483-212352679	212351483-212357248
GRMZM2G161004	1:188202887-188206198	+	3'	188205765-188206003	188205765-188206198
GRMZM2G161579	1:190843429-190845567	-	3'	190844098-190844681	190843429-190844681
GRMZM2G161579	1:190843429-190845567	-	5'	190845139-190845351	190845139-190845567
GRMZM2G162356	1:47903347-47905878	+	3'	47905512-47905748	47905512-47905878
GRMZM2G162725	1:14803899-14808698	+	5'	14803943-14804061	14803899-14804061
GRMZM2G162800	1:14921531-14927019	-	3'	14921635-14921894	14921531-14921894
GRMZM2G162800	1:14921531-14927019	-	5'	14926823-14926927	14926823-14927019
GRMZM2G162931	1:251018102-251035809	+	5'	251018143-251018631	251018102-251018631
GRMZM2G163154	1:27099367-27108875	-	3'	27099590-27099997	27099367-27099997
GRMZM2G164085	1:273602182-273607723	+	3'	273607270-273607645	273607270-273607723
GRMZM2G165042	1:252372670-252437736	-	5'	252437497-252437685	252437497-252437736
GRMZM2G165422	1:5237950-5241120	+	5'	5238057-5238267	5237950-5238267
GRMZM2G165422	1:5237950-5241120	+	3'	5240831-5241101	5240831-5241120
GRMZM2G165960	1:75324932-75328605	+	3'	75326825-75327031	75326825-75328605
GRMZM2G165972	1:12518162-12520811	+	5'	12518410-12518904	12518162-12518904
GRMZM2G165972	1:12518162-12520811	+	3'	12520488-12520734	12520488-12520811
GRMZM2G166979	1:107016150-107019335	+	5'	107016280-107016394	107016150-107016394
GRMZM2G166979	1:107016150-107019335	+	3'	107018552-107018776	107018552-107019335
GRMZM2G166999	1:278617427-278619799	+	5'	278617540-278617936	278617427-278617936
GRMZM2G166999	1:278617427-278619799	+	3'	278619660-278619744	278619660-278619799
GRMZM2G167138	1:31489514-31501814	-	5'	31501614-31501763	31501614-31501814
GRMZM2G167428	1:296730463-296739101	+	5'	296730703-296731082	296730463-296731082
GRMZM2G167428	1:296730463-296739101	+	3'	296738340-296738790	296738340-296739101
GRMZM2G167651	1:216734824-216741548	+	5'	216734844-216735020	216734824-216735020
GRMZM2G167651	1:216734824-216741548	+	3'	216740930-216741515	216740930-216741548
GRMZM2G167728	1:167047886-167051758	+	5'	167048120-167048716	167047886-167048716
GRMZM2G168222	1:242137489-242141286	-	3'	242137574-242138559	242137489-242138559
GRMZM2G168222	1:242137489-242141286	-	5'	242141044-242141229	242141044-242141286
GRMZM2G168849	1:189626116-189632103	-	5'	189631914-189631921	189631914-189632103
GRMZM2G169320	1:13534946-13538715	+	5'	13535097-13535554	13534946-13535554
GRMZM2G169820	1:190580075-190595543	+	5'	190580078-190580316	190580075-190580316
GRMZM2G170137	1:296849440-296855079	-	5'	296854732-296855068	296854732-296855079
GRMZM2G170489	1:290300661-290304275	+	5'	290300854-290301206	290300661-290301206
GRMZM2G170489	1:290300661-290304275	+	3'	290303839-290304171	290303839-290304275
GRMZM2G170851	1:287541505-287544017	+	3'	287543656-287544016	287543656-287544017
GRMZM2G171022	1:74054110-74056560	-	3'	74054142-74054406	74054110-74054406
GRMZM2G171073	1:23562530-23566090	-	5'	23565015-23566071	23565015-23566090
GRMZM2G171324	1:8617134-8622049	-	3'	8617191-8617351	8617134-8617351
GRMZM2G171324	1:8617134-8622049	-	5'	8620744-8621894	8620744-8622049
GRMZM2G171333	1:8626064-8628163	+	5'	8626189-8626189	8626064-8626189
GRMZM2G171333	1:8626064-8628163	+	3'	8627130-8627298	8627130-8628163
GRMZM2G171934	1:204103938-204106064	-	5'	204105771-204106057	204105771-204106064
GRMZM2G172183	1:979684-991241	+	3'	990956-991117	990956-991241
GRMZM2G172410	1:12975278-12984577	+	5'	12975288-12975479	12975278-12975479
GRMZM2G172410	1:12975278-12984577	+	3'	12984243-12984545	12984243-12984577
GRMZM2G172581	1:125811878-125819957	-	5'	125819806-125819955	125819806-125819957
GRMZM2G173030	1:68667696-68679216	+	3'	68678802-68679183	68678802-68679216
GRMZM2G173067	1:26434953-26439516	-	3'	26434984-26435273	26434953-26435273
GRMZM2G173067	1:26434953-26439516	-	5'	26439070-26439513	26439070-26439516
GRMZM2G173315	1:237237202-237243223	+	3'	237242914-237243148	237242914-237243223
GRMZM2G173404	1:144437407-144468238	-	3'	144437440-144437687	144437407-144437687
GRMZM2G173404	1:144437407-144468238	-	5'	144468152-144468228	144468152-144468238
GRMZM2G173852	1:276041244-276051332	+	3'	276050978-276051331	276050978-276051332
GRMZM2G174284	1:51753616-51759625	-	5'	51759152-51759590	51759152-51759625
GRMZM2G174554	1:180539557-180546681	+	5'	180539571-180539673	180539557-180539673
GRMZM2G174574	1:245086554-245091642	+	5'	245086624-245086723	245086554-245086723
GRMZM2G174896	1:52148141-52153328	-	3'	52148170-52148599	52148141-52148599
GRMZM2G174896	1:52148141-52153328	-	5'	52153135-52153288	52153135-52153328
GRMZM2G175164	1:16467595-16473215	+	3'	16472956-16473121	16472956-16473215
GRMZM2G176397	1:8131177-8143117	-	3'	8131181-8131656	8131177-8131656
GRMZM2G176397	1:8131177-8143117	-	5'	8142557-8143070	8142557-8143117
GRMZM2G176523	1:8093454-8097257	-	3'	8093584-8094752	8093454-8094752
GRMZM2G176523	1:8093454-8097257	-	5'	8097145-8097192	8097145-8097257
GRMZM2G176558	1:5428387-5433218	+	5'	5428401-5428712	5428387-5428712
GRMZM2G176735	1:268657817-268678404	-	3'	268657819-268658184	268657817-268658184
GRMZM2G176735	1:268657817-268678404	-	5'	268678169-268678314	268678169-268678404
GRMZM2G177400	1:87165707-87172724	+	3'	87172262-87172666	87172262-87172724
GRMZM2G177432	1:281951771-281954392	+	5'	281951791-281951870	281951771-281951870
GRMZM2G177532	1:58708413-58722799	+	3'	58722446-58722793	58722446-58722799
GRMZM2G177867	1:276740071-276750643	+	3'	276750181-276750588	276750181-276750643
GRMZM2G178079	1:81588731-81594310	+	5'	81588783-81588834	81588731-81588834
GRMZM2G178079	1:81588731-81594310	+	3'	81593854-81594131	81593854-81594310
GRMZM2G178415	1:287360596-287367859	-	5'	287367443-287367735	287367443-287367859
GRMZM2G178913	1:208153973-208160392	-	3'	208153994-208154265	208153973-208154265
GRMZM2G178913	1:208153973-208160392	-	5'	208160230-208160332	208160230-208160392
GRMZM2G179281	1:155622208-155642423	+	3'	155641935-155642346	155641935-155642423
GRMZM2G179317	1:155651348-155653852	+	3'	155653150-155653849	155653150-155653852
GRMZM2G179351	1:183321768-183335218	+	5'	183322516-183322516	183321768-183322516
GRMZM2G179411	1:43975517-43979470	+	5'	43975543-43975623	43975517-43975623
GRMZM2G179411	1:43975517-43979470	+	3'	43979068-43979461	43979068-43979470
GRMZM2G179473	1:271186914-271196148	+	3'	271195368-271196144	271195368-271196148
GRMZM2G179677	1:206161656-206168812	+	3'	206168487-206168807	206168487-206168812
GRMZM2G179906	1:272866043-272868963	+	5'	272866057-272866309	272866043-272866309
GRMZM2G179906	1:272866043-272868963	+	3'	272868719-272868952	272868719-272868963
GRMZM2G180044	1:29036289-29039784	-	3'	29036581-29036581	29036289-29036581
GRMZM2G180452	1:29257882-29264322	+	3'	29263666-29264281	29263666-29264322
GRMZM2G180879	1:181647376-181678399	+	5'	181647774-181647849	181647376-181647849
GRMZM2G180889	1:52218351-52226110	-	3'	52218533-52218741	52218351-52218741
GRMZM2G180951	1:5980936-6002159	-	3'	5980938-5981160	5980936-5981160
GRMZM2G300424	1:115768020-115772232	+	5'	115768429-115768515	115768020-115768515
GRMZM2G300424	1:115768020-115772232	+	3'	115770049-115770454	115770049-115772232
GRMZM2G300788	1:176077941-176082203	+	3'	176081909-176082168	176081909-176082203
GRMZM2G301098	1:182446629-182451158	+	3'	182450436-182451070	182450436-182451158
GRMZM2G301805	1:297990142-297995943	+	3'	297995492-297995492	297995492-297995943
GRMZM2G303007	1:83881344-83889900	-	5'	83889812-83889812	83889812-83889900
GRMZM2G303810	1:4432032-4438199	-	3'	4432072-4432072	4432032-4432072
GRMZM2G304638	1:297239853-297260886	+	3'	297259430-297259785	297259430-297260886
GRMZM2G306806	1:38879030-38884686	-	5'	38884096-38884605	38884096-38884686
GRMZM2G307992	1:45932916-45942658	-	5'	45942467-45942551	45942467-45942658
GRMZM2G308570	1:3885977-3899531	-	3'	3886166-3886585	3885977-3886585
GRMZM2G308666	1:60702279-60704658	+	3'	60704169-60704479	60704169-60704658
GRMZM2G311165	1:30749106-30756527	-	3'	30750058-30750127	30749106-30750127
GRMZM2G314133	1:13785991-13804049	-	3'	13786057-13786703	13785991-13786703
GRMZM2G314133	1:13785991-13804049	-	5'	13801491-13803954	13801491-13804049
GRMZM2G314660	1:3070526-3075128	-	3'	3070619-3071165	3070526-3071165
GRMZM2G315848	1:157080242-157084209	+	3'	157083850-157084090	157083850-157084209
GRMZM2G316775	1:251555859-251559393	-	3'	251557409-251557457	251555859-251557457
GRMZM2G316775	1:251555859-251559393	-	5'	251559047-251559114	251559047-251559393
GRMZM2G317386	1:90797338-90800442	+	5'	90797897-90797984	90797338-90797984
GRMZM2G317386	1:90797338-90800442	+	3'	90799084-90799084	90799084-90800442
GRMZM2G318803	1:201662451-201667177	-	3'	201662604-201663033	201662451-201663033
GRMZM2G318803	1:201662451-201667177	-	5'	201666956-201667147	201666956-201667177
GRMZM2G319022	1:5713168-5734524	+	5'	5713200-5713338	5713168-5713338
GRMZM2G319022	1:5713168-5734524	+	3'	5733997-5734294	5733997-5734524
GRMZM2G319281	1:258035280-258037726	+	3'	258037434-258037705	258037434-258037726
GRMZM2G319781	1:44031678-44034319	-	3'	44031814-44032084	44031678-44032084
GRMZM2G319781	1:44031678-44034319	-	5'	44034111-44034240	44034111-44034319
GRMZM2G322024	1:150113785-150122553	+	5'	150114086-150114086	150113785-150114086
GRMZM2G323261	1:298373753-298378567	-	3'	298374355-298374581	298373753-298374581
GRMZM2G323261	1:298373753-298378567	-	5'	298377736-298377836	298377736-298378567
GRMZM2G326643	1:116022494-116097635	+	5'	116022594-116022826	116022494-116022826
GRMZM2G327059	1:5080743-5086704	+	5'	5080780-5081720	5080743-5081720
GRMZM2G329177	1:2425690-2433529	+	5'	2426203-2426235	2425690-2426235
GRMZM2G329300	1:286034559-286043658	+	5'	286034596-286034760	286034559-286034760
GRMZM2G329300	1:286034559-286043658	+	3'	286043193-286043648	286043193-286043658
GRMZM2G329655	1:164572042-164574396	-	3'	164572134-164572943	164572042-164572943
GRMZM2G329655	1:164572042-164574396	-	5'	164574345-164574375	164574345-164574396
GRMZM2G329909	1:191885174-191892288	+	5'	191885470-191885470	191885174-191885470
GRMZM2G330436	1:515997-526855	-	5'	526785-526846	526785-526855
GRMZM2G338131	1:43110058-43112445	-	5'	43112272-43112328	43112272-43112445
GRMZM2G338333	1:42518977-42522305	+	5'	42519187-42519373	42518977-42519373
GRMZM2G341269	1:71598405-71618533	-	5'	71618319-71618360	71618319-71618533
GRMZM2G342105	1:253827507-253837657	-	3'	253827545-253827827	253827507-253827827
GRMZM2G342105	1:253827507-253837657	-	5'	253837386-253837409	253837386-253837657
GRMZM2G342685	1:27861651-27869321	+	5'	27861841-27862138	27861651-27862138
GRMZM2G342685	1:27861651-27869321	+	3'	27868858-27869120	27868858-27869321
GRMZM2G343916	1:111208794-111231146	+	5'	111208878-111209047	111208794-111209047
GRMZM2G343916	1:111208794-111231146	+	3'	111230904-111231121	111230904-111231146
GRMZM2G344521	1:254590285-254594593	-	3'	254590445-254590627	254590285-254590627
GRMZM2G344521	1:254590285-254594593	-	5'	254594369-254594484	254594369-254594593
GRMZM2G345725	1:223384488-223392924	-	3'	223384523-223385286	223384488-223385286
GRMZM2G345725	1:223384488-223392924	-	5'	223392720-223392830	223392720-223392924
GRMZM2G346263	1:265018615-265025476	-	5'	265025194-265025388	265025194-265025476
GRMZM2G347808	1:69012709-69020488	+	5'	69012717-69012812	69012709-69012812
GRMZM2G347808	1:69012709-69020488	+	3'	69019757-69020335	69019757-69020488
GRMZM2G348452	1:207753075-207758232	+	5'	207753174-207753288	207753075-207753288
GRMZM2G348452	1:207753075-207758232	+	3'	207757556-207757725	207757556-207758232
GRMZM2G352883	1:43062966-43069350	-	3'	43063776-43064226	43062966-43064226
GRMZM2G353607	1:198637504-198644384	-	5'	198642777-198643114	198642777-198644384
GRMZM2G355771	1:253071542-253079446	+	3'	253079444-253079444	253079444-253079446
GRMZM2G359929	1:269186559-269192154	-	5'	269192080-269192080	269192080-269192154
GRMZM2G360626	1:166333845-166341705	+	5'	166334193-166334193	166333845-166334193
GRMZM2G361842	1:173335503-173340706	-	3'	173335601-173335937	173335503-173335937
GRMZM2G361842	1:173335503-173340706	-	5'	173340469-173340617	173340469-173340706
GRMZM2G362303	1:186666703-186673406	-	3'	186667188-186667188	186666703-186667188
GRMZM2G362303	1:186666703-186673406	-	5'	186672768-186672768	186672768-186673406
GRMZM2G363545	1:291051940-291058167	-	3'	291051941-291052964	291051940-291052964
GRMZM2G363545	1:291051940-291058167	-	5'	291057390-291057953	291057390-291058167
GRMZM2G364145	1:30346812-30350545	+	5'	30348042-30349719	30346812-30349719
GRMZM2G364178	1:30348483-30350572	-	5'	30349125-30350545	30349125-30350572
GRMZM2G367023	1:98327041-98343940	+	5'	98327351-98327351	98327041-98327351
GRMZM2G369130	1:258442386-258447583	-	3'	258442739-258442948	258442386-258442948
GRMZM2G369130	1:258442386-258447583	-	5'	258446669-258446721	258446669-258447583
GRMZM2G372398	1:36501765-36519260	+	5'	36501767-36501828	36501765-36501828
GRMZM2G372398	1:36501765-36519260	+	3'	36518422-36518959	36518422-36519260
GRMZM2G373341	1:87922130-87926111	-	3'	87922552-87922702	87922130-87922702
GRMZM2G374779	1:999304-1003190	+	5'	999356-999549	999304-999549
GRMZM2G374973	1:226374998-226381516	-	3'	226375873-226375873	226374998-226375873
GRMZM2G377487	1:300516288-300523771	-	3'	300516485-300516485	300516288-300516485
GRMZM2G377487	1:300516288-300523771	-	5'	300523187-300523483	300523187-300523771
GRMZM2G378907	1:60094955-60104052	-	3'	60094998-60095332	60094955-60095332
GRMZM2G378907	1:60094955-60104052	-	5'	60103844-60103977	60103844-60104052
GRMZM2G380286	1:232571675-232577414	+	5'	232571717-232571744	232571675-232571744
GRMZM2G380777	1:107294377-107311229	+	5'	107294500-107294500	107294377-107294500
GRMZM2G380955	1:45094381-45100908	+	5'	45094543-45095120	45094381-45095120
GRMZM2G385050	1:76888887-76904210	-	3'	76889586-76890265	76888887-76890265
GRMZM2G385050	1:76888887-76904210	-	5'	76904090-76904169	76904090-76904210
GRMZM2G385605	1:18273068-18293747	+	5'	18273174-18273174	18273068-18273174
GRMZM2G386463	1:199647315-199660309	+	3'	199660126-199660273	199660126-199660309
GRMZM2G387837	1:4016800-4019283	+	5'	4016858-4016858	4016800-4016858
GRMZM2G388892	1:227796065-227820022	+	5'	227796157-227796157	227796065-227796157
GRMZM2G388915	1:21982693-21993488	-	3'	21982918-21982918	21982693-21982918
GRMZM2G388915	1:21982693-21993488	-	5'	21993343-21993343	21993343-21993488
GRMZM2G389645	1:279243790-279246148	+	5'	279243792-279243976	279243790-279243976
GRMZM2G389645	1:279243790-279246148	+	3'	279245445-279245498	279245445-279246148
GRMZM2G392956	1:6834737-6845550	-	5'	6845321-6845524	6845321-6845550
GRMZM2G393935	1:249123813-249161579	+	5'	249124496-249124496	249123813-249124496
GRMZM2G394212	1:50093542-50103906	-	3'	50093597-50093699	50093542-50093699
GRMZM2G395094	1:247181113-247193636	+	5'	247181750-247181750	247181113-247181750
GRMZM2G395121	1:25876199-25883629	+	5'	25876202-25876312	25876199-25876312
GRMZM2G395121	1:25876199-25883629	+	3'	25883199-25883530	25883199-25883629
GRMZM2G396114	1:273157646-273168349	-	3'	273157848-273158218	273157646-273158218
GRMZM2G396114	1:273157646-273168349	-	5'	273167739-273168093	273167739-273168349
GRMZM2G396477	1:178257350-178279599	+	3'	178279382-178279410	178279382-178279599
GRMZM2G397055	1:19345188-19355409	-	3'	19345240-19345597	19345188-19345597
GRMZM2G399320	1:55379747-55387708	+	5'	55379778-55379915	55379747-55379915
GRMZM2G400092	1:265079699-265086565	-	3'	265079700-265080074	265079699-265080074
GRMZM2G401769	1:42191145-42197793	-	3'	42191151-42191151	42191145-42191151
GRMZM2G401769	1:42191145-42197793	-	5'	42197356-42197429	42197356-42197793
GRMZM2G408305	1:37206651-37220562	-	3'	37206668-37207305	37206651-37207305
GRMZM2G408305	1:37206651-37220562	-	5'	37220333-37220484	37220333-37220562
GRMZM2G410479	1:67529475-67539757	-	3'	67529480-67530571	67529475-67530571
GRMZM2G410479	1:67529475-67539757	-	5'	67539492-67539492	67539492-67539757
GRMZM2G410623	1:17671929-17679611	+	3'	17679415-17679589	17679415-17679611
GRMZM2G410990	1:2219061-2223797	+	5'	2219065-2219246	2219061-2219246
GRMZM2G410990	1:2219061-2223797	+	3'	2223585-2223784	2223585-2223797
GRMZM2G412430	1:67856716-67858961	-	3'	67856797-67857230	67856716-67857230
GRMZM2G413835	1:270802556-270810175	+	3'	270809688-270809980	270809688-270810175
GRMZM2G415215	1:256482526-256527905	-	3'	256483004-256483101	256482526-256483101
GRMZM2G415215	1:256482526-256527905	-	5'	256527571-256527571	256527571-256527905
GRMZM2G416069	1:201502366-201519199	+	3'	201518872-201519179	201518872-201519199
GRMZM2G417217	1:291607055-291632087	-	3'	291607067-291607591	291607055-291607591
GRMZM2G417410	1:157489160-157514822	-	3'	157489287-157489631	157489160-157489631
GRMZM2G419436	1:185773082-185811820	-	3'	185773132-185773132	185773082-185773132
GRMZM2G420723	1:146515757-146519299	-	3'	146516704-146516769	146515757-146516769
GRMZM2G420723	1:146515757-146519299	-	5'	146519207-146519239	146519207-146519299
GRMZM2G423472	1:180715229-180720394	+	3'	180720287-180720314	180720287-180720394
GRMZM2G423851	1:53944269-53948013	-	3'	53944283-53944886	53944269-53944886
GRMZM2G423851	1:53944269-53948013	-	5'	53947933-53947989	53947933-53948013
GRMZM2G423886	1:92520823-92523523	+	3'	92523224-92523518	92523224-92523523
GRMZM2G425719	1:92351971-92354472	+	5'	92352007-92353032	92351971-92353032
GRMZM2G425778	1:294737998-294739613	-	5'	294738966-294739095	294738966-294739613
GRMZM2G426200	1:297547339-297570276	-	5'	297569750-297570220	297569750-297570276
GRMZM2G426271	1:38629830-38641262	-	3'	38629920-38631901	38629830-38631901
GRMZM2G430371	1:184408978-184412150	-	3'	184410045-184410333	184408978-184410333
GRMZM2G430371	1:184408978-184412150	-	5'	184411749-184411988	184411749-184412150
GRMZM2G432566	1:20212303-20218499	+	5'	20212312-20212616	20212303-20212616
GRMZM2G432566	1:20212303-20218499	+	3'	20217988-20218493	20217988-20218499
GRMZM2G432850	1:147903299-147907639	+	5'	147903774-147903774	147903299-147903774
GRMZM2G433579	1:28862104-28868268	+	5'	28862221-28862423	28862104-28862423
GRMZM2G433579	1:28862104-28868268	+	3'	28868005-28868203	28868005-28868268
GRMZM2G434219	1:300053895-300058011	-	3'	300053906-300054552	300053895-300054552
GRMZM2G436226	1:3022451-3033849	+	5'	3022700-3022700	3022451-3022700
GRMZM2G436304	1:167932323-167935085	-	3'	167932428-167933133	167932323-167933133
GRMZM2G438960	1:245927860-245931894	-	3'	245928173-245928173	245927860-245928173
GRMZM2G438960	1:245927860-245931894	-	5'	245931761-245931761	245931761-245931894
GRMZM2G440363	1:22979042-22985756	+	3'	22985661-22985661	22985661-22985756
GRMZM2G442763	1:200035395-200041027	+	5'	200035403-200035778	200035395-200035778
GRMZM2G442763	1:200035395-200041027	+	3'	200040463-200040990	200040463-200041027
GRMZM2G443453	1:270723658-270729324	+	3'	270728956-270729322	270728956-270729324
GRMZM2G443525	1:164103133-164108542	+	5'	164103203-164103414	164103133-164103414
GRMZM2G444692	1:244129735-244148378	-	5'	244147861-244148096	244147861-244148378
GRMZM2G445783	1:11775602-11791448	+	3'	11791059-11791202	11791059-11791448
GRMZM2G447551	1:19788647-19813933	-	3'	19788672-19788891	19788647-19788891
GRMZM2G447551	1:19788647-19813933	-	5'	19813541-19813731	19813541-19813933
GRMZM2G448185	1:208867893-208873994	-	3'	208868050-208868348	208867893-208868348
GRMZM2G448185	1:208867893-208873994	-	5'	208873713-208873974	208873713-208873994
GRMZM2G448523	1:296062401-296067234	+	5'	296062510-296062510	296062401-296062510
GRMZM2G448927	1:287819489-287827612	-	3'	287819575-287820062	287819489-287820062
GRMZM2G449779	1:141278761-141294013	-	5'	141293759-141293996	141293759-141294013
GRMZM2G450920	1:292417473-292430965	+	5'	292417709-292417709	292417473-292417709
GRMZM2G450920	1:292417473-292430965	+	3'	292430146-292430613	292430146-292430965
GRMZM2G451856	1:124688276-124699173	-	3'	124691579-124691579	124688276-124691579
GRMZM2G451856	1:124688276-124699173	-	5'	124698885-124699069	124698885-124699173
GRMZM2G453794	1:4172555-4187594	+	3'	4187121-4187541	4187121-4187594
GRMZM2G455817	1:245752276-245756839	-	5'	245756550-245756678	245756550-245756839
GRMZM2G456357	1:151513989-151516937	-	3'	151514959-151516148	151513989-151516148
GRMZM2G456357	1:151513989-151516937	-	5'	151516504-151516930	151516504-151516937
GRMZM2G456452	1:227595533-227597318	+	3'	227597088-227597088	227597088-227597318
GRMZM2G457178	1:22495551-22509321	-	3'	22497825-22498174	22495551-22498174
GRMZM2G459391	1:214284522-214291336	+	5'	214284589-214284595	214284522-214284595
GRMZM2G459811	1:293870055-293875569	+	3'	293874716-293875566	293874716-293875569
GRMZM2G460988	1:75075620-75081433	+	3'	75080518-75080629	75080518-75081433
GRMZM2G461269	1:180359561-180365798	+	5'	180359657-180359657	180359561-180359657
GRMZM2G461269	1:180359561-180365798	+	3'	180365158-180365537	180365158-180365798
GRMZM2G461278	1:180365739-180370696	-	3'	180366146-180366691	180365739-180366691
GRMZM2G461278	1:180365739-180370696	-	5'	180370129-180370208	180370129-180370696
GRMZM2G463318	1:256618649-256620061	-	3'	256618835-256619081	256618649-256619081
GRMZM2G463318	1:256618649-256620061	-	5'	256619588-256619637	256619588-256620061
GRMZM2G463730	1:283389432-283396556	-	3'	283389452-283389957	283389432-283389957
GRMZM2G463730	1:283389432-283396556	-	5'	283396307-283396343	283396307-283396556
GRMZM2G464515	1:21249626-21250731	+	5'	21249806-21249956	21249626-21249956
GRMZM2G464515	1:21249626-21250731	+	3'	21250333-21250515	21250333-21250731
GRMZM2G464575	1:74488856-74496597	+	3'	74496028-74496530	74496028-74496597
GRMZM2G464782	1:277099167-277112873	+	5'	277099198-277099588	277099167-277099588
GRMZM2G465806	1:7592784-7597281	-	5'	7597178-7597178	7597178-7597281
GRMZM2G466460	1:213178656-213180771	+	3'	213179478-213180497	213179478-213180771
GRMZM2G466563	1:220900797-220904557	-	3'	220901787-220901789	220900797-220901789
GRMZM2G468740	1:263717419-263719960	+	5'	263717427-263717558	263717419-263717558
GRMZM2G469162	1:60397503-60409019	+	5'	60397892-60397892	60397503-60397892
GRMZM2G469551	1:230596368-230608568	-	5'	230608301-230608346	230608301-230608568
GRMZM2G469795	1:107311669-107319928	+	5'	107311671-107311740	107311669-107311740
GRMZM2G471108	1:300187925-300228907	-	3'	300188069-300188660	300187925-300188660
GRMZM2G472827	1:283257318-283262852	+	3'	283262354-283262785	283262354-283262852
GRMZM2G474258	1:8627366-8630977	-	3'	8628195-8628195	8627366-8628195
GRMZM2G474602	1:111555887-111576953	+	3'	111576794-111576932	111576794-111576953
GRMZM2G474798	1:289646406-289670056	-	5'	289669905-289669951	289669905-289670056
GRMZM2G475289	1:4742077-4745924	+	5'	4742268-4742612	4742077-4742612
GRMZM2G475380	1:4760806-4765836	-	3'	4760983-4760983	4760806-4760983
GRMZM2G475380	1:4760806-4765836	-	5'	4765716-4765716	4765716-4765836
GRMZM2G477609	1:294578503-294584309	+	5'	294578526-294578628	294578503-294578628
GRMZM2G477872	1:197104150-197113406	+	5'	197104210-197104210	197104150-197104210
GRMZM2G477879	1:269990788-270006379	+	5'	269990792-269990942	269990788-269990942
GRMZM2G478212	1:105468008-105479355	-	3'	105468124-105468338	105468008-105468338
GRMZM2G480262	1:291730470-291742840	+	5'	291731110-291731110	291730470-291731110
GRMZM2G482290	1:285648657-285651224	+	5'	285648664-285648689	285648657-285648689
GRMZM2G483779	1:1155474-1167165	-	3'	1155582-1155765	1155474-1155765
GRMZM2G485898	1:216032845-216050260	-	3'	216033015-216033015	216032845-216033015
GRMZM2G485898	1:216032845-216050260	-	5'	216049998-216049998	216049998-216050260
GRMZM2G488692	1:174821542-174826585	-	3'	174821564-174821564	174821542-174821564
GRMZM2G488692	1:174821542-174826585	-	5'	174826447-174826447	174826447-174826585
GRMZM2G524711	1:70585585-70601522	-	3'	70585635-70585831	70585585-70585831
GRMZM2G532387	1:248810985-248812999	-	5'	248812882-248812882	248812882-248812999
GRMZM2G536825	1:214578163-214584917	-	3'	214578271-214578381	214578163-214578381
GRMZM2G536825	1:214578163-214584917	-	5'	214584897-214584899	214584897-214584917
GRMZM2G561114	1:198449135-198450825	-	3'	198450561-198450720	198449135-198450720
GRMZM2G703466	1:2040460-2045157	-	3'	2040712-2040712	2040460-2040712
GRMZM2G703490	1:11396805-11401432	-	5'	11401221-11401324	11401221-11401432
GRMZM2G703749	1:138021982-138030204	+	5'	138022108-138022277	138021982-138022277
GRMZM2G703749	1:138021982-138030204	+	3'	138030023-138030200	138030023-138030204
GRMZM2G704021	1:263452721-263456724	+	5'	263452723-263452807	263452721-263452807
GRMZM2G704021	1:263452721-263456724	+	3'	263456372-263456716	263456372-263456724
GRMZM5G800112	1:220650222-220653789	-	5'	220653611-220653755	220653611-220653789
GRMZM5G802858	1:276315618-276322322	-	3'	276315715-276316377	276315618-276316377
GRMZM5G803556	1:245277012-245280606	+	5'	245277041-245277041	245277012-245277041
GRMZM5G803556	1:245277012-245280606	+	3'	245280012-245280571	245280012-245280606
GRMZM5G808350	1:63501428-63504673	+	5'	63501484-63501493	63501428-63501493
GRMZM5G808350	1:63501428-63504673	+	3'	63503984-63504623	63503984-63504673
GRMZM5G809195	1:288465729-288467255	-	3'	288465742-288466371	288465729-288466371
GRMZM5G809265	1:235628888-235639922	+	5'	235628980-235629317	235628888-235629317
GRMZM5G809265	1:235628888-235639922	+	3'	235639376-235639600	235639376-235639922
GRMZM5G811095	1:141541594-141543989	+	5'	141541611-141541923	141541594-141541923
GRMZM5G811593	1:112645844-112648605	-	3'	112645938-112646920	112645844-112646920
GRMZM5G811593	1:112645844-112648605	-	5'	112648066-112648375	112648066-112648605
GRMZM5G812926	1:251443900-251449381	+	5'	251444196-251444357	251443900-251444357
GRMZM5G813670	1:85739881-85743160	-	3'	85740165-85740378	85739881-85740378
GRMZM5G813886	1:11984982-11991574	-	5'	11991283-11991283	11991283-11991574
GRMZM5G813892	1:89448263-89451842	+	3'	89451581-89451835	89451581-89451842
GRMZM5G815369	1:65423142-65443745	+	3'	65441028-65441749	65441028-65443745
GRMZM5G817046	1:210964132-210966620	-	3'	210964374-210964374	210964132-210964374
GRMZM5G817651	1:144243094-144250768	+	5'	144243097-144243182	144243094-144243182
GRMZM5G817934	1:280262987-280275974	+	3'	280275302-280275949	280275302-280275974
GRMZM5G818431	1:32582740-32587142	-	3'	32582760-32582987	32582740-32582987
GRMZM5G818431	1:32582740-32587142	-	5'	32586126-32587100	32586126-32587142
GRMZM5G818983	1:124286462-124288829	-	3'	124287722-124288050	124286462-124288050
GRMZM5G818983	1:124286462-124288829	-	5'	124288394-124288680	124288394-124288829
GRMZM5G819320	1:266230748-266237287	-	5'	266237211-266237285	266237211-266237287
GRMZM5G820122	1:9298049-9302326	-	5'	9301585-9301828	9301585-9302326
GRMZM5G822098	1:226702405-226706933	-	3'	226702512-226702569	226702405-226702569
GRMZM5G822098	1:226702405-226706933	-	5'	226706641-226706888	226706641-226706933
GRMZM5G822593	1:188148066-188153483	+	5'	188148388-188148520	188148066-188148520
GRMZM5G824405	1:45641587-45669303	+	5'	45641610-45641813	45641587-45641813
GRMZM5G824405	1:45641587-45669303	+	3'	45669010-45669297	45669010-45669303
GRMZM5G826714	1:277444691-277450118	-	5'	277449817-277450112	277449817-277450118
GRMZM5G827566	1:81883312-81884855	+	5'	81883874-81883964	81883312-81883964
GRMZM5G827566	1:81883312-81884855	+	3'	81884170-81884181	81884170-81884855
GRMZM5G828396	1:192065162-192068032	+	5'	192065332-192065629	192065162-192065629
GRMZM5G828661	1:272106576-272109063	-	3'	272106767-272106767	272106576-272106767
GRMZM5G829103	1:250377674-250382280	+	5'	250377935-250378101	250377674-250378101
GRMZM5G829103	1:250377674-250382280	+	3'	250380580-250382233	250380580-250382280
GRMZM5G831313	1:167614682-167616696	-	3'	167614683-167614741	167614682-167614741
GRMZM5G831313	1:167614682-167616696	-	5'	167616633-167616689	167616633-167616696
GRMZM5G832908	1:158489140-158494313	+	5'	158489322-158489777	158489140-158489777
GRMZM5G833774	1:8266043-8270585	-	5'	8270113-8270578	8270113-8270585
GRMZM5G835810	1:51040375-51046800	-	3'	51040379-51040988	51040375-51040988
GRMZM5G836588	1:236863114-236879303	-	5'	236879141-236879249	236879141-236879303
GRMZM5G836977	1:172965952-172968207	-	5'	172968092-172968092	172968092-172968207
GRMZM5G837018	1:282529652-282539516	+	5'	282529941-282530547	282529652-282530547
GRMZM5G837018	1:282529652-282539516	+	3'	282538165-282539440	282538165-282539516
GRMZM5G840610	1:36569556-36574918	-	5'	36574616-36574896	36574616-36574918
GRMZM5G841053	1:61530673-61532573	+	5'	61531164-61531164	61530673-61531164
GRMZM5G841053	1:61530673-61532573	+	3'	61531448-61531448	61531448-61532573
GRMZM5G844703	1:217503175-217504732	-	5'	217504478-217504727	217504478-217504732
GRMZM5G849959	1:57837766-57842934	-	5'	57842764-57842932	57842764-57842934
GRMZM5G852177	1:172922557-172926591	-	3'	172922609-172922766	172922557-172922766
GRMZM5G852177	1:172922557-172926591	-	5'	172926295-172926566	172926295-172926591
GRMZM5G854284	1:49216991-49218938	-	3'	49217068-49217246	49216991-49217246
GRMZM5G854901	1:188048202-188051328	-	5'	188051318-188051323	188051318-188051328
GRMZM5G855891	1:227375754-227378991	-	3'	227375756-227375854	227375754-227375854
GRMZM5G856366	1:275742507-275744188	-	3'	275743388-275743388	275742507-275743388
GRMZM5G856366	1:275742507-275744188	-	5'	275743576-275743576	275743576-275744188
GRMZM5G860152	1:35501106-35505395	-	3'	35501343-35501726	35501106-35501726
GRMZM5G860152	1:35501106-35505395	-	5'	35505020-35505020	35505020-35505395
GRMZM5G860498	1:233779396-233784917	-	3'	233779397-233779484	233779396-233779484
GRMZM5G860938	1:9353538-9360004	-	3'	9353553-9353766	9353538-9353766
GRMZM5G860938	1:9353538-9360004	-	5'	9359906-9359959	9359906-9360004
GRMZM5G861997	1:227118218-227126447	-	5'	227126324-227126420	227126324-227126447
GRMZM5G862467	1:71152241-71155715	-	5'	71155229-71155528	71155229-71155715
GRMZM5G865999	1:267596635-267614021	+	3'	267613475-267613962	267613475-267614021
GRMZM5G866843	1:103834719-103838410	-	5'	103837943-103838119	103837943-103838410
GRMZM5G867121	1:83019205-83021760	-	3'	83019858-83020044	83019205-83020044
GRMZM5G867121	1:83019205-83021760	-	5'	83021304-83021546	83021304-83021760
GRMZM5G868062	1:32530092-32537511	+	3'	32537173-32537476	32537173-32537511
GRMZM5G868757	1:105159532-105163813	-	3'	105159679-105160054	105159532-105160054
GRMZM5G869779	1:226063076-226070437	+	3'	226069770-226070426	226069770-226070437
GRMZM5G871419	1:227990404-227996840	-	3'	227990522-227990791	227990404-227990791
GRMZM5G871419	1:227990404-227996840	-	5'	227996608-227996740	227996608-227996840
GRMZM5G872264	1:22254225-22259424	-	5'	22259311-22259311	22259311-22259424
GRMZM5G874478	1:296281969-296284318	+	5'	296282014-296282014	296281969-296282014
GRMZM5G874562	1:228077616-228081738	-	5'	228081661-228081688	228081661-228081738
GRMZM5G876022	1:137962430-137964542	-	3'	137962637-137962637	137962430-137962637
GRMZM5G876022	1:137962430-137964542	-	5'	137964300-137964300	137964300-137964542
GRMZM5G877929	1:274578830-274582687	+	5'	274578973-274578973	274578830-274578973
GRMZM5G877929	1:274578830-274582687	+	3'	274579305-274579305	274579305-274582687
GRMZM5G878732	1:161322177-161324146	-	3'	161322245-161322515	161322177-161322515
GRMZM5G879527	1:188064971-188068262	+	5'	188065123-188065729	188064971-188065729
GRMZM5G879527	1:188064971-188068262	+	3'	188067555-188068113	188067555-188068262
GRMZM5G879665	1:230982486-230985680	-	3'	230982816-230982816	230982486-230982816
GRMZM5G879665	1:230982486-230985680	-	5'	230985341-230985511	230985341-230985680
GRMZM5G880508	1:22245684-22252701	+	5'	22246085-22246085	22245684-22246085
GRMZM5G880508	1:22245684-22252701	+	3'	22252397-22252609	22252397-22252701
GRMZM5G881369	1:296974432-296979644	+	3'	296979188-296979619	296979188-296979644
GRMZM5G881887	1:199788869-199790996	+	5'	199788957-199788957	199788869-199788957
GRMZM5G881887	1:199788869-199790996	+	3'	199790721-199790819	199790721-199790996
GRMZM5G882418	1:295389157-295393055	-	3'	295389162-295389375	295389157-295389375
GRMZM5G882821	1:59507360-59510682	-	3'	59507378-59507807	59507360-59507807
GRMZM5G884466	1:301336854-301363348	-	5'	301363304-301363304	301363304-301363348
GRMZM5G885628	1:61021585-61025032	-	3'	61021664-61022354	61021585-61022354
GRMZM5G886952	1:38791034-38799950	+	5'	38791249-38791574	38791034-38791574
GRMZM5G886952	1:38791034-38799950	+	3'	38799645-38799875	38799645-38799950
GRMZM5G888196	1:285598294-285600310	-	3'	285598874-285599129	285598294-285599129
GRMZM5G889620	1:200315242-200322569	-	3'	200315248-200315392	200315242-200315392
GRMZM5G890241	1:25438838-25452714	+	3'	25452302-25452621	25452302-25452714
GRMZM5G890472	1:117438591-117441275	-	3'	117439940-117439940	117438591-117439940
GRMZM5G890472	1:117438591-117441275	-	5'	117440170-117440170	117440170-117441275
GRMZM5G891371	1:235634046-235636785	-	3'	235634344-235634646	235634046-235634646
GRMZM5G891371	1:235634046-235636785	-	5'	235636212-235636614	235636212-235636785
GRMZM5G891425	1:136807911-136810433	+	5'	136808041-136808390	136807911-136808390
GRMZM5G891425	1:136807911-136810433	+	3'	136808797-136809704	136808797-136810433
GRMZM5G891724	1:296979804-296983268	+	5'	296979937-296980106	296979804-296980106
GRMZM5G891739	1:27178540-27184697	-	3'	27178601-27178874	27178540-27178874
GRMZM5G891739	1:27178540-27184697	-	5'	27184611-27184636	27184611-27184697
GRMZM5G891990	1:40812617-40817650	+	5'	40812730-40812730	40812617-40812730
GRMZM5G891990	1:40812617-40817650	+	3'	40817033-40817561	40817033-40817650
GRMZM5G892973	1:257132629-257137447	-	3'	257132739-257132945	257132629-257132945
GRMZM5G892973	1:257132629-257137447	-	5'	257137276-257137359	257137276-257137447
GRMZM5G894031	1:67053118-67055483	-	3'	67054551-67054551	67053118-67054551
GRMZM5G894031	1:67053118-67055483	-	5'	67054997-67054997	67054997-67055483
GRMZM5G894518	1:193200631-193206052	-	3'	193200690-193200974	193200631-193200974
GRMZM5G895175	1:219033755-219039704	-	3'	219033880-219034095	219033755-219034095
GRMZM5G895188	1:232709804-232718322	+	3'	232717461-232718307	232717461-232718322
GRMZM5G895573	1:22151432-22154550	+	3'	22154490-22154549	22154490-22154550
GRMZM5G895991	1:51154583-51159060	+	5'	51154606-51154703	51154583-51154703
GRMZM5G896731	1:59464177-59469640	+	5'	59464238-59464594	59464177-59464594
GRMZM5G899260	1:78568508-78571576	-	3'	78569608-78570571	78568508-78570571
GRMZM5G899260	1:78568508-78571576	-	5'	78571083-78571470	78571083-78571576
GRMZM5G899944	1:226451098-226456331	+	5'	226454850-226454850	226451098-226454850
GRMZM5G899944	1:226451098-226456331	+	3'	226455281-226455281	226455281-226456331
GRMZM6G332242	1:223626042-223626901	+	5'	223626044-223626388	223626042-223626388
GRMZM6G332242	1:223626042-223626901	+	3'	223626875-223626899	223626875-223626901
GRMZM6G477257	1:283154011-283156506	+	3'	283156503-283156503	283156503-283156506
GRMZM6G829919	1:204630254-204631580	+	5'	204630296-204630384	204630254-204630384
GRMZM6G914387	1:214678980-214680330	+	5'	214679504-214679546	214678980-214679546
GRMZM6G915669	1:225244797-225399850	-	3'	225244843-225245028	225244797-225245028
AC152495.1_FG012	10:3384744-3388278	-	3'	3385712-3385712	3384744-3385712
AC194485.3_FG002	10:108738419-108763688	-	5'	108760839-108760839	108760839-108763688
AC197146.3_FG002	10:2460936-2470597	+	3'	2470558-2470558	2470558-2470597
AC197672.3_FG002	10:98147398-98169076	+	3'	98168566-98168566	98168566-98169076
AC198699.3_FG004	10:18739068-18745412	+	3'	18744791-18744926	18744791-18745412
AC199705.3_FG008	10:129943725-129966812	+	3'	129966639-129966639	129966639-129966812
AC203570.4_FG005	10:90233759-90259363	+	5'	90233849-90233849	90233759-90233849
AC203841.3_FG009	10:124250679-124257847	-	3'	124251191-124251191	124250679-124251191
AC203841.3_FG009	10:124250679-124257847	-	5'	124257836-124257836	124257836-124257847
AC207755.3_FG005	10:6168282-6170583	-	5'	6170372-6170372	6170372-6170583
AC208110.2_FG006	10:140161312-140166711	+	5'	140161391-140161534	140161312-140161534
AC209206.3_FG011	10:137505002-137513779	+	3'	137513415-137513415	137513415-137513779
AC210050.3_FG006	10:16496549-16505061	-	3'	16497792-16497792	16496549-16497792
AC214266.3_FG002	10:42538503-42541557	+	5'	42538725-42538725	42538503-42538725
AC214266.3_FG002	10:42538503-42541557	+	3'	42541154-42541154	42541154-42541557
AC231747.1_FG001	10:108482846-108489649	-	5'	108489488-108489488	108489488-108489649
AC233888.1_FG001	10:127957274-127960053	+	5'	127957386-127957386	127957274-127957386
AC233888.1_FG001	10:127957274-127960053	+	3'	127959778-127959778	127959778-127960053
AC233898.1_FG004	10:10399268-10404170	+	5'	10399524-10399593	10399268-10399593
AC233898.1_FG004	10:10399268-10404170	+	3'	10403748-10404066	10403748-10404170
AC233914.1_FG001	10:149031619-149033888	+	5'	149031744-149031744	149031619-149031744
AC233979.1_FG006	10:135080593-135083048	-	5'	135082668-135082825	135082668-135083048
AC233979.1_FG009	10:135186199-135194196	+	3'	135193853-135193853	135193853-135194196
AC233979.1_FG010	10:135195148-135197556	+	3'	135197232-135197232	135197232-135197556
AC234201.1_FG003	10:149185362-149187680	-	3'	149185497-149185497	149185362-149185497
AC234201.1_FG003	10:149185362-149187680	-	5'	149187444-149187444	149187444-149187680
AF466202.2_FG008	10:138620902-138630034	+	3'	138629501-138629501	138629501-138630034
GRMZM2G000245	10:128583721-128590953	-	3'	128583776-128583971	128583721-128583971
GRMZM2G000339	10:14501009-14509266	-	5'	14509124-14509245	14509124-14509266
GRMZM2G000620	10:143570380-143574223	+	5'	143570637-143570729	143570380-143570729
GRMZM2G000620	10:143570380-143574223	+	3'	143573924-143573924	143573924-143574223
GRMZM2G000633	10:143565298-143570034	-	3'	143565467-143565552	143565298-143565552
GRMZM2G000973	10:133332732-133338522	-	5'	133338193-133338321	133338193-133338522
GRMZM2G001272	10:8789860-8797034	-	5'	8796793-8796975	8796793-8797034
GRMZM2G001530	10:77686850-77691939	-	3'	77686954-77687224	77686850-77687224
GRMZM2G001530	10:77686850-77691939	-	5'	77691859-77691931	77691859-77691939
GRMZM2G002483	10:46004031-46006256	+	3'	46006012-46006214	46006012-46006256
GRMZM2G002542	10:11907059-11910032	-	3'	11907530-11907530	11907059-11907530
GRMZM2G002542	10:11907059-11910032	-	5'	11909688-11909688	11909688-11910032
GRMZM2G003124	10:137767299-137771772	+	5'	137767472-137768080	137767299-137768080
GRMZM2G003190	10:144408908-144413412	-	5'	144413117-144413411	144413117-144413412
GRMZM2G003648	10:104836301-104917281	+	5'	104836348-104836387	104836301-104836387
GRMZM2G003750	10:4667844-4670688	-	5'	4670502-4670650	4670502-4670688
GRMZM2G004412	10:2986679-2996440	+	3'	2996114-2996389	2996114-2996440
GRMZM2G004732	10:56764278-56767068	-	3'	56764383-56764568	56764278-56764568
GRMZM2G005126	10:84252169-84259743	-	3'	84252239-84252659	84252169-84252659
GRMZM2G005126	10:84252169-84259743	-	5'	84258144-84259713	84258144-84259743
GRMZM2G005848	10:10791222-10809055	-	5'	10808883-10808920	10808883-10809055
GRMZM2G005939	10:127383061-127387710	-	5'	127387213-127387700	127387213-127387710
GRMZM2G005947	10:19588041-19593835	-	3'	19588051-19588541	19588041-19588541
GRMZM2G006042	10:13788443-13794488	-	5'	13794188-13794457	13794188-13794488
GRMZM2G006216	10:127378245-127382754	+	3'	127382373-127382709	127382373-127382754
GRMZM2G006493	10:13006879-13025884	-	3'	13006885-13007119	13006879-13007119
GRMZM2G006493	10:13006879-13025884	-	5'	13025702-13025813	13025702-13025884
GRMZM2G006948	10:124545291-124553490	-	3'	124545468-124545797	124545291-124545797
GRMZM2G007140	10:60759136-60773920	+	5'	60759258-60759258	60759136-60759258
GRMZM2G007140	10:60759136-60773920	+	3'	60773761-60773761	60773761-60773920
GRMZM2G007229	10:104270268-104292808	-	5'	104292609-104292800	104292609-104292808
GRMZM2G007477	10:145605728-145607927	-	3'	145605846-145606024	145605728-145606024
GRMZM2G007477	10:145605728-145607927	-	5'	145607202-145607808	145607202-145607927
GRMZM2G007721	10:98702771-98732349	+	3'	98731998-98732307	98731998-98732349
GRMZM2G008622	10:147669023-147672614	+	3'	147672411-147672573	147672411-147672614
GRMZM2G008730	10:146159989-146163683	+	5'	146160923-146160969	146159989-146160969
GRMZM2G008730	10:146159989-146163683	+	3'	146163144-146163640	146163144-146163683
GRMZM2G009353	10:63565191-63570337	+	5'	63565345-63566071	63565191-63566071
GRMZM2G010095	10:38582906-38599059	-	3'	38583070-38583335	38582906-38583335
GRMZM2G010290	10:137229690-137232271	+	5'	137229762-137229962	137229690-137229962
GRMZM2G010290	10:137229690-137232271	+	3'	137232013-137232013	137232013-137232271
GRMZM2G012756	10:39352711-39356830	-	3'	39352775-39353132	39352711-39353132
GRMZM2G012756	10:39352711-39356830	-	5'	39356519-39356789	39356519-39356830
GRMZM2G012761	10:58193741-58208232	+	5'	58193802-58193915	58193741-58193915
GRMZM2G012761	10:58193741-58208232	+	3'	58207801-58208208	58207801-58208232
GRMZM2G013478	10:23254208-23259866	-	3'	23254225-23254499	23254208-23254499
GRMZM2G014376	10:25983369-25988391	-	3'	25983459-25984138	25983369-25984138
GRMZM2G014376	10:25983369-25988391	-	5'	25988229-25988271	25988229-25988391
GRMZM2G016097	10:143733428-143740332	+	5'	143733448-143733649	143733428-143733649
GRMZM2G016097	10:143733428-143740332	+	3'	143739912-143740302	143739912-143740332
GRMZM2G016926	10:107160048-107165523	-	5'	107165356-107165520	107165356-107165523
GRMZM2G016939	10:134434810-134438539	+	5'	134434838-134435024	134434810-134435024
GRMZM2G016939	10:134434810-134438539	+	3'	134438267-134438537	134438267-134438539
GRMZM2G017419	10:89936002-89943644	+	5'	89936005-89936146	89936002-89936146
GRMZM2G017647	10:139730153-139735559	-	3'	139730155-139730394	139730153-139730394
GRMZM2G017815	10:132390438-132395723	+	5'	132390643-132390879	132390438-132390879
GRMZM2G018027	10:134740953-134743492	-	3'	134741566-134742368	134740953-134742368
GRMZM2G018027	10:134740953-134743492	-	5'	134743015-134743313	134743015-134743492
GRMZM2G019246	10:99220166-99223118	-	3'	99220249-99221418	99220166-99221418
GRMZM2G019246	10:99220166-99223118	-	5'	99222296-99222839	99222296-99223118
GRMZM2G019986	10:141495963-141500449	-	5'	141499965-141500441	141499965-141500449
GRMZM2G022283	10:37545796-37567991	+	5'	37545840-37545977	37545796-37545977
GRMZM2G022283	10:37545796-37567991	+	3'	37567313-37567320	37567313-37567991
GRMZM2G022308	10:107306969-107311190	-	5'	107310769-107311161	107310769-107311190
GRMZM2G025592	10:141612636-141620442	-	5'	141620296-141620390	141620296-141620442
GRMZM2G025939	10:92836971-92845182	-	5'	92845040-92845040	92845040-92845182
GRMZM2G026391	10:133841203-133845176	-	3'	133841323-133841499	133841203-133841499
GRMZM2G026391	10:133841203-133845176	-	5'	133844373-133845170	133844373-133845176
GRMZM2G026983	10:134461109-134465499	-	3'	134461209-134461422	134461109-134461422
GRMZM2G027241	10:114715844-114718464	+	5'	114715907-114716228	114715844-114716228
GRMZM2G028307	10:16492632-16509470	+	5'	16492667-16492969	16492632-16492969
GRMZM2G028307	10:16492632-16509470	+	3'	16509040-16509433	16509040-16509470
GRMZM2G028492	10:146483253-146489695	-	3'	146483259-146483533	146483253-146483533
GRMZM2G028929	10:141389160-141394342	-	5'	141394058-141394314	141394058-141394342
GRMZM2G029242	10:142222065-142226001	-	5'	142225400-142225975	142225400-142226001
GRMZM2G029307	10:64275448-64280564	-	3'	64275682-64275996	64275448-64275996
GRMZM2G031529	10:141370294-141376292	-	5'	141375936-141376285	141375936-141376292
GRMZM2G031628	10:130321350-130327467	-	3'	130321519-130321816	130321350-130321816
GRMZM2G031656	10:7125761-7131451	+	5'	7125801-7126270	7125761-7126270
GRMZM2G031721	10:130329353-130444039	+	5'	130329657-130329823	130329353-130329823
GRMZM2G032293	10:105112551-105141525	-	3'	105112606-105112884	105112551-105112884
GRMZM2G033375	10:146652914-146671705	-	5'	146671638-146671677	146671638-146671705
GRMZM2G033388	10:146654564-146658653	+	5'	146655330-146655612	146654564-146655612
GRMZM2G033388	10:146654564-146658653	+	3'	146656191-146656310	146656191-146658653
GRMZM2G033724	10:141781980-141787484	+	3'	141787121-141787455	141787121-141787484
GRMZM2G033746	10:132936679-132939077	+	3'	132938547-132939020	132938547-132939077
GRMZM2G034152	10:62256204-62265303	-	3'	62260920-62261351	62256204-62261351
GRMZM2G034313	10:109150119-109155640	+	3'	109153210-109154402	109153210-109155640
GRMZM2G034727	10:39921474-39924425	-	3'	39922729-39922848	39921474-39922848
GRMZM2G034727	10:39921474-39924425	-	5'	39924328-39924376	39924328-39924425
GRMZM2G034882	10:124463692-124466847	-	3'	124463698-124464018	124463692-124464018
GRMZM2G034882	10:124463692-124466847	-	5'	124466620-124466843	124466620-124466847
GRMZM2G035282	10:100267564-100269576	-	3'	100267591-100267787	100267564-100267787
GRMZM2G036407	10:23194834-23197057	+	3'	23195925-23196241	23195925-23197057
GRMZM2G036685	10:4561180-4568121	-	5'	4567718-4568012	4567718-4568121
GRMZM2G036918	10:2797341-2803216	+	5'	2797529-2797782	2797341-2797782
GRMZM2G036918	10:2797341-2803216	+	3'	2802464-2803099	2802464-2803216
GRMZM2G037064	10:2791665-2795770	+	3'	2795217-2795520	2795217-2795770
GRMZM2G038050	10:148985679-148996952	-	3'	148985897-148986508	148985679-148986508
GRMZM2G038394	10:132976424-132982680	+	3'	132982335-132982593	132982335-132982680
GRMZM2G039671	10:72818914-72828699	-	3'	72818947-72819172	72818914-72819172
GRMZM2G040078	10:89555269-89560896	-	3'	89555365-89555597	89555269-89555597
GRMZM2G040803	10:132533983-132537786	-	5'	132537476-132537765	132537476-132537786
GRMZM2G040876	10:147527292-147533098	-	5'	147532902-147533075	147532902-147533098
GRMZM2G040968	10:20391694-20418406	+	3'	20418137-20418386	20418137-20418406
GRMZM2G041454	10:88602400-88622738	+	5'	88602409-88602815	88602400-88602815
GRMZM2G042895	10:76600002-76602269	+	3'	76601871-76602213	76601871-76602269
GRMZM2G043150	10:1950508-1959880	-	5'	1959669-1959844	1959669-1959880
GRMZM2G045280	10:118122675-118160117	-	3'	118122698-118123052	118122675-118123052
GRMZM2G045507	10:71171788-71175921	+	5'	71171840-71171967	71171788-71171967
GRMZM2G045507	10:71171788-71175921	+	3'	71175491-71175862	71175491-71175921
GRMZM2G046583	10:116816531-116826333	+	3'	116825826-116826228	116825826-116826333
GRMZM2G046861	10:65004420-65013655	+	5'	65004421-65004627	65004420-65004627
GRMZM2G047065	10:114675749-114676820	+	3'	114676344-114676500	114676344-114676820
GRMZM2G048067	10:1411345-1423269	-	3'	1411349-1412310	1411345-1412310
GRMZM2G048067	10:1411345-1423269	-	5'	1422984-1423184	1422984-1423269
GRMZM2G050394	10:26093476-26099494	+	5'	26093564-26093845	26093476-26093845
GRMZM2G050394	10:26093476-26099494	+	3'	26098428-26099454	26098428-26099494
GRMZM2G050647	10:115945119-115955452	+	5'	115945143-115945221	115945119-115945221
GRMZM2G050647	10:115945119-115955452	+	3'	115955017-115955403	115955017-115955452
GRMZM2G051866	10:130415769-130426747	-	5'	130426219-130426576	130426219-130426747
GRMZM2G052036	10:60030680-60031900	+	5'	60030845-60030845	60030680-60030845
GRMZM2G052036	10:60030680-60031900	+	3'	60031485-60031794	60031485-60031900
GRMZM2G052328	10:63411287-63415310	+	5'	63411395-63411445	63411287-63411445
GRMZM2G054250	10:25562433-25565564	-	3'	25562470-25562713	25562433-25562713
GRMZM2G054397	10:80929679-80936641	+	5'	80929713-80930063	80929679-80930063
GRMZM2G054397	10:80929679-80936641	+	3'	80935994-80936324	80935994-80936641
GRMZM2G054418	10:133343023-133354821	-	5'	133354516-133354774	133354516-133354821
GRMZM2G054615	10:133391880-133394316	+	5'	133391911-133392022	133391880-133392022
GRMZM2G054615	10:133391880-133394316	+	3'	133393691-133394043	133393691-133394316
GRMZM2G055660	10:141829542-141830831	-	3'	141829597-141829986	141829542-141829986
GRMZM2G057084	10:133239821-133259589	+	5'	133239823-133240020	133239821-133240020
GRMZM2G057084	10:133239821-133259589	+	3'	133259233-133259536	133259233-133259589
GRMZM2G057437	10:123696234-123704511	+	5'	123696238-123696472	123696234-123696472
GRMZM2G057437	10:123696234-123704511	+	3'	123704150-123704485	123704150-123704511
GRMZM2G057441	10:1152498-1158583	-	3'	1152579-1152831	1152498-1152831
GRMZM2G057441	10:1152498-1158583	-	5'	1158275-1158548	1158275-1158583
GRMZM2G057525	10:1149285-1151784	-	3'	1149291-1149704	1149285-1149704
GRMZM2G057554	10:123706193-123710696	-	5'	123710592-123710625	123710592-123710696
GRMZM2G057557	10:1145814-1148836	-	3'	1146098-1146258	1145814-1146258
GRMZM2G057557	10:1145814-1148836	-	5'	1148764-1148797	1148764-1148836
GRMZM2G057567	10:140931420-140935751	-	3'	140931431-140931863	140931420-140931863
GRMZM2G058081	10:44458758-44460028	+	5'	44459128-44459143	44458758-44459143
GRMZM2G058098	10:142670616-142675088	+	5'	142670634-142670772	142670616-142670772
GRMZM2G058498	10:49806762-49818049	-	3'	49806773-49807066	49806762-49807066
GRMZM2G058531	10:3186497-3191436	+	5'	3187672-3187696	3186497-3187696
GRMZM2G058531	10:3186497-3191436	+	3'	3189570-3191169	3189570-3191436
GRMZM2G058595	10:3192610-3196091	+	5'	3193616-3193616	3192610-3193616
GRMZM2G058595	10:3192610-3196091	+	3'	3195834-3195834	3195834-3196091
GRMZM2G058612	10:23076511-23081224	-	3'	23076535-23076890	23076511-23076890
GRMZM2G058612	10:23076511-23081224	-	5'	23080730-23081155	23080730-23081224
GRMZM2G059110	10:115450734-115461230	+	3'	115460194-115460464	115460194-115461230
GRMZM2G059214	10:11810805-11816472	-	3'	11811061-11811301	11810805-11811301
GRMZM2G059517	10:88417421-88423449	+	5'	88417429-88417573	88417421-88417573
GRMZM2G059517	10:88417421-88423449	+	3'	88422895-88423247	88422895-88423449
GRMZM2G060183	10:29543704-29546316	+	5'	29543777-29543879	29543704-29543879
GRMZM2G061879	10:93409981-93414359	+	5'	93409989-93409989	93409981-93409989
GRMZM2G062541	10:87703756-87706701	+	5'	87704026-87704190	87703756-87704190
GRMZM2G062541	10:87703756-87706701	+	3'	87706060-87706060	87706060-87706701
GRMZM2G063394	10:12749422-12759930	-	3'	12749437-12749833	12749422-12749833
GRMZM2G063394	10:12749422-12759930	-	5'	12759381-12759810	12759381-12759930
GRMZM2G063972	10:134519917-134528491	+	3'	134528253-134528489	134528253-134528491
GRMZM2G064008	10:31460134-31463444	+	5'	31461032-31461340	31460134-31461340
GRMZM2G064008	10:31460134-31463444	+	3'	31461840-31461941	31461840-31463444
GRMZM2G064831	10:144630354-144635323	-	3'	144630450-144631710	144630354-144631710
GRMZM2G064831	10:144630354-144635323	-	5'	144634554-144635115	144634554-144635323
GRMZM2G065292	10:125133860-125151778	+	3'	125151451-125151734	125151451-125151778
GRMZM2G065804	10:5900720-5904776	+	5'	5900930-5901202	5900720-5901202
GRMZM2G066059	10:127832761-127834749	-	3'	127832805-127833521	127832761-127833521
GRMZM2G066059	10:127832761-127834749	-	5'	127834254-127834732	127834254-127834749
GRMZM2G066961	10:105694599-105696236	-	3'	105694786-105694786	105694599-105694786
GRMZM2G066961	10:105694599-105696236	-	5'	105696099-105696099	105696099-105696236
GRMZM2G066981	10:146110125-146116814	-	3'	146110506-146111042	146110125-146111042
GRMZM2G067299	10:146085173-146089108	-	5'	146088566-146089027	146088566-146089108
GRMZM2G068071	10:100869446-100924063	+	5'	100869451-100869606	100869446-100869606
GRMZM2G068465	10:3065600-3069762	-	5'	3069506-3069726	3069506-3069762
GRMZM2G070092	10:120237308-120241680	+	3'	120241362-120241527	120241362-120241680
GRMZM2G071264	10:128724648-128759384	+	3'	128759078-128759170	128759078-128759384
GRMZM2G072513	10:117576558-117580676	-	3'	117576572-117576772	117576558-117576772
GRMZM2G073581	10:141075519-141111931	-	5'	141111678-141111678	141111678-141111931
GRMZM2G074489	10:65486680-65501642	-	3'	65486715-65487601	65486680-65487601
GRMZM2G074489	10:65486680-65501642	-	5'	65501466-65501619	65501466-65501642
GRMZM2G075676	10:120298581-120303328	-	3'	120298584-120299053	120298581-120299053
GRMZM2G076602	10:144777434-144780827	+	3'	144779943-144780346	144779943-144780827
GRMZM2G077458	10:129533905-129544404	+	5'	129533916-129533972	129533905-129533972
GRMZM2G077486	10:80419650-80426131	-	3'	80419760-80420059	80419650-80420059
GRMZM2G081585	10:103975245-103979273	-	5'	103979036-103979249	103979036-103979273
GRMZM2G082522	10:85852892-85858294	-	5'	85858139-85858248	85858139-85858294
GRMZM2G084463	10:27549835-27553524	-	3'	27549938-27550420	27549835-27550420
GRMZM2G084463	10:27549835-27553524	-	5'	27553298-27553439	27553298-27553524
GRMZM2G084586	10:146020693-146035491	-	3'	146020725-146021051	146020693-146021051
GRMZM2G086496	10:80056274-80062495	+	3'	80062142-80062481	80062142-80062495
GRMZM2G087531	10:21398150-21410722	-	3'	21398217-21398636	21398150-21398636
GRMZM2G088140	10:37913818-37954099	-	5'	37953845-37954097	37953845-37954099
GRMZM2G088313	10:4055178-4066341	+	5'	4056213-4056331	4055178-4056331
GRMZM2G088320	10:3019683-3021165	+	5'	3019739-3019838	3019683-3019838
GRMZM2G088320	10:3019683-3021165	+	3'	3020957-3021114	3020957-3021165
GRMZM2G088487	10:39599913-39603741	-	3'	39599962-39600207	39599913-39600207
GRMZM2G088487	10:39599913-39603741	-	5'	39603153-39603665	39603153-39603741
GRMZM2G088539	10:36031794-36056882	+	5'	36031867-36031961	36031794-36031961
GRMZM2G088539	10:36031794-36056882	+	3'	36056469-36056874	36056469-36056882
GRMZM2G089163	10:90828851-90833459	-	3'	90828886-90829901	90828851-90829901
GRMZM2G089296	10:90782780-90798008	+	5'	90782813-90782930	90782780-90782930
GRMZM2G089484	10:88694952-88700894	+	3'	88700290-88700854	88700290-88700894
GRMZM2G089565	10:1498829-1502997	+	5'	1498840-1499174	1498829-1499174
GRMZM2G091581	10:138909986-138915442	+	5'	138910115-138910436	138909986-138910436
GRMZM2G092365	10:147320864-147322579	+	3'	147322431-147322577	147322431-147322579
GRMZM2G092571	10:147332052-147334795	+	5'	147332132-147332393	147332052-147332393
GRMZM2G092607	10:147337431-147342637	+	5'	147337601-147337926	147337431-147337926
GRMZM2G092747	10:120028729-120053457	+	5'	120028820-120028829	120028729-120028829
GRMZM2G093858	10:83561141-83565322	+	5'	83561145-83561382	83561141-83561382
GRMZM2G093858	10:83561141-83565322	+	3'	83565062-83565227	83565062-83565322
GRMZM2G093950	10:10284633-10290922	+	3'	10290585-10290839	10290585-10290922
GRMZM2G096107	10:142498498-142510535	-	5'	142510166-142510448	142510166-142510535
GRMZM2G097499	10:120665948-120673518	+	5'	120666029-120666481	120665948-120666481
GRMZM2G097499	10:120665948-120673518	+	3'	120672722-120673450	120672722-120673518
GRMZM2G097504	10:120674944-120678235	-	3'	120674959-120676191	120674944-120676191
GRMZM2G097504	10:120674944-120678235	-	5'	120677957-120678223	120677957-120678235
GRMZM2G097605	10:89382794-89388323	+	5'	89382795-89383020	89382794-89383020
GRMZM2G097662	10:106857844-106862831	-	5'	106861682-106862802	106861682-106862831
GRMZM2G097848	10:134998595-135001635	-	3'	134998783-134998954	134998595-134998954
GRMZM2G097854	10:143165123-143167467	+	5'	143165140-143165700	143165123-143165700
GRMZM2G098596	10:1542055-1545892	+	5'	1542108-1542226	1542055-1542226
GRMZM2G099002	10:86711390-86721069	-	5'	86720892-86721041	86720892-86721069
GRMZM2G101179	10:145769917-145774751	-	5'	145774551-145774663	145774551-145774751
GRMZM2G101928	10:4160245-4165130	-	3'	4161244-4161335	4160245-4161335
GRMZM2G101928	10:4160245-4165130	-	5'	4164902-4165105	4164902-4165130
GRMZM2G102156	10:49904301-49914740	-	3'	49904376-49904690	49904301-49904690
GRMZM2G102156	10:49904301-49914740	-	5'	49914703-49914711	49914703-49914740
GRMZM2G103841	10:95573143-95577254	+	5'	95573188-95573418	95573143-95573418
GRMZM2G103841	10:95573143-95577254	+	3'	95576953-95577147	95576953-95577254
GRMZM2G103909	10:22133369-22140745	-	5'	22140468-22140730	22140468-22140745
GRMZM2G104199	10:145555469-145562891	-	3'	145555475-145556240	145555469-145556240
GRMZM2G104268	10:145533336-145550483	+	3'	145549870-145550014	145549870-145550483
GRMZM2G104658	10:148410228-148419414	-	5'	148418809-148419253	148418809-148419414
GRMZM2G104882	10:148421870-148425171	-	3'	148422827-148423570	148421870-148423570
GRMZM2G104882	10:148421870-148425171	-	5'	148424799-148424989	148424799-148425171
GRMZM2G105004	10:127591471-127597271	+	5'	127592222-127592350	127591471-127592350
GRMZM2G105855	10:136203510-136208677	-	3'	136203821-136204067	136203510-136204067
GRMZM2G107306	10:123249151-123251867	-	3'	123249169-123249423	123249151-123249423
GRMZM2G107306	10:123249151-123251867	-	5'	123251569-123251735	123251569-123251867
GRMZM2G107557	10:146685646-146689886	-	5'	146689704-146689877	146689704-146689886
GRMZM2G108125	10:141705116-141717094	+	5'	141705143-141705303	141705116-141705303
GRMZM2G108125	10:141705116-141717094	+	3'	141716691-141717058	141716691-141717094
GRMZM2G108892	10:81701317-81729386	+	5'	81701345-81701395	81701317-81701395
GRMZM2G109674	10:630296-635230	+	5'	630477-630564	630296-630564
GRMZM2G109674	10:630296-635230	+	3'	634876-635225	634876-635230
GRMZM2G109753	10:140355512-140426752	+	5'	140355566-140355634	140355512-140355634
GRMZM2G109753	10:140355512-140426752	+	3'	140426529-140426711	140426529-140426752
GRMZM2G110869	10:148738398-148747727	-	3'	148738549-148738791	148738398-148738791
GRMZM2G113228	10:5735648-5739270	+	3'	5739002-5739240	5739002-5739270
GRMZM2G113682	10:75157773-75167249	-	3'	75157806-75157988	75157773-75157988
GRMZM2G115579	10:18865345-18869413	-	5'	18869166-18869396	18869166-18869413
GRMZM2G116538	10:132907629-132926499	-	3'	132907694-132907944	132907629-132907944
GRMZM2G116626	10:91727033-91733995	-	3'	91727089-91727286	91727033-91727286
GRMZM2G116626	10:91727033-91733995	-	5'	91733712-91733954	91733712-91733995
GRMZM2G118214	10:9409405-9411365	+	3'	9411052-9411344	9411052-9411365
GRMZM2G118286	10:9383464-9407372	+	5'	9383491-9383593	9383464-9383593
GRMZM2G118610	10:64494294-64497487	-	5'	64497138-64497324	64497138-64497487
GRMZM2G119465	10:34372458-34377432	-	3'	34372919-34372919	34372458-34372919
GRMZM2G119802	10:141516805-141520645	-	3'	141516809-141517257	141516805-141517257
GRMZM2G119867	10:67277668-67285014	+	3'	67284278-67284791	67284278-67285014
GRMZM2G120136	10:144700081-144706394	+	5'	144700121-144700485	144700081-144700485
GRMZM2G120530	10:29231478-29236201	-	3'	29231510-29231802	29231478-29231802
GRMZM2G121096	10:67944955-67951841	-	3'	67945080-67945889	67944955-67945889
GRMZM2G121096	10:67944955-67951841	-	5'	67951516-67951812	67951516-67951841
GRMZM2G121612	10:142347036-142356351	+	5'	142347313-142347495	142347036-142347495
GRMZM2G122897	10:142812772-142821683	-	3'	142812773-142813272	142812772-142813272
GRMZM2G122941	10:72306162-72307745	+	5'	72306292-72306399	72306162-72306399
GRMZM2G122941	10:72306162-72307745	+	3'	72307509-72307591	72307509-72307745
GRMZM2G123029	10:87103466-87106603	+	5'	87103468-87103638	87103466-87103638
GRMZM2G123410	10:81194714-81197172	+	3'	81197034-81197151	81197034-81197172
GRMZM2G123886	10:79149337-79153580	+	3'	79151712-79152033	79151712-79153580
GRMZM2G124466	10:146586520-146591112	+	5'	146586522-146586653	146586520-146586653
GRMZM2G124495	10:146575581-146579170	-	3'	146575608-146575941	146575581-146575941
GRMZM2G125001	10:4396450-4399157	+	5'	4396464-4396575	4396450-4396575
GRMZM2G125083	10:146640932-146648948	-	5'	146648893-146648938	146648893-146648948
GRMZM2G125476	10:118987937-118990220	-	5'	118989985-118990215	118989985-118990220
GRMZM2G126496	10:105072979-105096715	+	3'	105096441-105096625	105096441-105096715
GRMZM2G126665	10:134056984-134062029	+	3'	134058665-134059255	134058665-134062029
GRMZM2G126858	10:141858618-141869227	-	3'	141858691-141859362	141858618-141859362
GRMZM2G126957	10:141891507-141904488	+	5'	141891517-141891720	141891507-141891720
GRMZM2G127393	10:2657136-2665931	-	3'	2657170-2660669	2657136-2660669
GRMZM2G128074	10:139403029-139407475	-	3'	139403539-139403738	139403029-139403738
GRMZM2G128074	10:139403029-139407475	-	5'	139407284-139407380	139407284-139407475
GRMZM2G128092	10:139418309-139426346	-	3'	139418318-139418555	139418309-139418555
GRMZM2G128092	10:139418309-139426346	-	5'	139426204-139426322	139426204-139426346
GRMZM2G128399	10:113764771-113785475	-	3'	113764794-113765063	113764771-113765063
GRMZM2G129071	10:140419826-140445884	-	5'	140445663-140445720	140445663-140445884
GRMZM2G129954	10:1725412-1728110	-	5'	1728017-1728063	1728017-1728110
GRMZM2G130062	10:1728590-1734962	-	3'	1728667-1728964	1728590-1728964
GRMZM2G130062	10:1728590-1734962	-	5'	1734555-1734854	1734555-1734962
GRMZM2G131611	10:95136279-95139861	-	5'	95139272-95139575	95139272-95139861
GRMZM2G133016	10:125125536-125133025	+	3'	125132220-125132807	125132220-125133025
GRMZM2G133018	10:138216865-138218947	-	5'	138218478-138218808	138218478-138218947
GRMZM2G136344	10:120802672-120805284	+	5'	120802689-120802778	120802672-120802778
GRMZM2G136895	10:144110170-144116164	-	5'	144115876-144115996	144115876-144116164
GRMZM2G137451	10:111015778-111020377	-	5'	111020030-111020087	111020030-111020377
GRMZM2G138659	10:2252057-2259299	+	3'	2258777-2259197	2258777-2259299
GRMZM2G138870	10:147763624-147764869	+	5'	147763656-147763843	147763624-147763843
GRMZM2G139419	10:118167728-118179266	-	5'	118178957-118179258	118178957-118179266
GRMZM2G140726	10:117841927-117851124	-	5'	117850866-117851101	117850866-117851124
GRMZM2G141136	10:72620825-72623452	+	3'	72622036-72623231	72622036-72623452
GRMZM2G141948	10:20983772-21029449	+	3'	21028818-21029384	21028818-21029449
GRMZM2G143168	10:121991153-121995714	+	5'	121991188-121991435	121991153-121991435
GRMZM2G143168	10:121991153-121995714	+	3'	121995171-121995615	121995171-121995714
GRMZM2G143352	10:145384699-145385704	+	5'	145384711-145384846	145384699-145384846
GRMZM2G143352	10:145384699-145385704	+	3'	145385473-145385639	145385473-145385704
GRMZM2G143356	10:145376700-145382782	+	3'	145382366-145382697	145382366-145382782
GRMZM2G143590	10:121737909-121749732	-	3'	121738153-121738461	121737909-121738461
GRMZM2G143590	10:121737909-121749732	-	5'	121749545-121749667	121749545-121749732
GRMZM2G145123	10:76517946-76521933	+	3'	76520047-76520328	76520047-76521933
GRMZM2G145130	10:76520230-76523836	-	5'	76523706-76523706	76523706-76523836
GRMZM2G145460	10:142015991-142023861	+	3'	142023364-142023750	142023364-142023861
GRMZM2G145578	10:17168997-17175874	-	5'	17175464-17175768	17175464-17175874
GRMZM2G146981	10:47785082-47787146	+	5'	47785345-47785516	47785082-47785516
GRMZM2G146981	10:47785082-47787146	+	3'	47786742-47787077	47786742-47787146
GRMZM2G148078	10:43818712-43820965	-	3'	43818724-43818959	43818712-43818959
GRMZM2G148594	10:142914819-142924821	-	3'	142914867-142915201	142914819-142915201
GRMZM2G149216	10:55162122-55165186	+	5'	55162224-55162363	55162122-55162363
GRMZM2G149216	10:55162122-55165186	+	3'	55164891-55165098	55164891-55165186
GRMZM2G149236	10:55113211-55161057	+	3'	55160795-55161033	55160795-55161057
GRMZM2G149994	10:128043968-128049516	+	5'	128043973-128044411	128043968-128044411
GRMZM2G149994	10:128043968-128049516	+	3'	128049348-128049512	128049348-128049516
GRMZM2G150107	10:139593307-139594154	+	3'	139593955-139594115	139593955-139594154
GRMZM2G150212	10:147018597-147025652	-	3'	147018687-147019129	147018597-147019129
GRMZM2G150212	10:147018597-147025652	-	5'	147025352-147025609	147025352-147025652
GRMZM2G150901	10:142681769-142686842	+	5'	142681795-142682122	142681769-142682122
GRMZM2G150901	10:142681769-142686842	+	3'	142686275-142686823	142686275-142686842
GRMZM2G150950	10:142692410-142696042	-	3'	142692424-142693059	142692410-142693059
GRMZM2G152661	10:109590910-109599672	+	3'	109599342-109599342	109599342-109599672
GRMZM2G153017	10:145046571-145056894	+	5'	145046642-145046761	145046571-145046761
GRMZM2G155341	10:132996514-132999236	-	3'	132996529-132996753	132996514-132996753
GRMZM2G155392	10:66651419-66652359	-	3'	66651522-66651522	66651419-66651522
GRMZM2G155837	10:141898425-141910908	-	3'	141898655-141899001	141898425-141899001
GRMZM2G155837	10:141898425-141910908	-	5'	141910496-141910652	141910496-141910908
GRMZM2G155962	10:110218276-110228167	+	5'	110218349-110218565	110218276-110218565
GRMZM2G155962	10:110218276-110228167	+	3'	110227958-110228163	110227958-110228167
GRMZM2G156174	10:140985253-140997619	+	3'	140996925-140997553	140996925-140997619
GRMZM2G157812	10:96139574-96144374	-	5'	96144140-96144271	96144140-96144374
GRMZM2G158069	10:118840772-118844255	+	3'	118843391-118844140	118843391-118844255
GRMZM2G158140	10:118859203-118862166	-	3'	118859404-118859719	118859203-118859719
GRMZM2G158140	10:118859203-118862166	-	5'	118861193-118862065	118861193-118862166
GRMZM2G159002	10:66555141-66559873	+	5'	66555171-66555332	66555141-66555332
GRMZM2G159330	10:101047758-101065514	-	3'	101047761-101048087	101047758-101048087
GRMZM2G159732	10:109722281-109727091	+	5'	109722375-109722802	109722281-109722802
GRMZM2G159732	10:109722281-109727091	+	3'	109726691-109727028	109726691-109727091
GRMZM2G165757	10:74913241-74918220	-	5'	74917994-74918156	74917994-74918220
GRMZM2G167868	10:105772358-105775336	-	5'	105775122-105775290	105775122-105775336
GRMZM2G168166	10:112055631-112113238	+	5'	112055650-112055929	112055631-112055929
GRMZM2G168166	10:112055631-112113238	+	3'	112112911-112113177	112112911-112113238
GRMZM2G168953	10:132567748-132577881	+	5'	132570001-132570001	132567748-132570001
GRMZM2G169005	10:132634466-132636371	+	5'	132634493-132634912	132634466-132634912
GRMZM2G170291	10:84269093-84278652	-	5'	84278208-84278641	84278208-84278652
GRMZM2G171187	10:77116966-77119402	+	3'	77119084-77119345	77119084-77119402
GRMZM2G171518	10:33613531-33625739	+	5'	33613533-33613753	33613531-33613753
GRMZM2G173040	10:99807829-99811242	-	5'	99811111-99811198	99811111-99811242
GRMZM2G173321	10:65200137-65213174	-	5'	65212974-65213038	65212974-65213174
GRMZM2G173597	10:124350042-124356380	-	3'	124350110-124350364	124350042-124350364
GRMZM2G173597	10:124350042-124356380	-	5'	124355874-124356220	124355874-124356380
GRMZM2G173649	10:124340594-124346643	-	5'	124346484-124346561	124346484-124346643
GRMZM2G173682	10:147965757-147970622	-	3'	147965797-147966034	147965757-147966034
GRMZM2G173878	10:124319396-124322173	+	5'	124319406-124319605	124319396-124319605
GRMZM2G174803	10:24959049-24966256	+	5'	24959328-24959328	24959049-24959328
GRMZM2G174830	10:24971564-24977285	-	5'	24976845-24977217	24976845-24977285
GRMZM2G175313	10:127058818-127070286	+	5'	127058959-127059107	127058818-127059107
GRMZM2G175549	10:116635120-116638488	-	3'	116635221-116635500	116635120-116635500
GRMZM2G176472	10:23812655-23816765	-	3'	23812687-23812933	23812655-23812933
GRMZM2G177203	10:99390191-99399786	+	3'	99399483-99399730	99399483-99399786
GRMZM2G179092	10:74488455-74492395	-	3'	74488739-74488739	74488455-74488739
GRMZM2G179092	10:74488455-74492395	-	5'	74492279-74492309	74492279-74492395
GRMZM2G179097	10:127002750-127008710	-	3'	127002814-127002929	127002750-127002929
GRMZM2G179097	10:127002750-127008710	-	5'	127008398-127008697	127008398-127008710
GRMZM2G180155	10:2037562-2044335	+	5'	2039154-2039270	2037562-2039270
GRMZM2G180155	10:2037562-2044335	+	3'	2040429-2041723	2040429-2044335
GRMZM2G180166	10:2041350-2046821	-	5'	2046419-2046783	2046419-2046821
GRMZM2G180244	10:2052378-2059124	-	3'	2052395-2052738	2052378-2052738
GRMZM2G180254	10:2127169-2133571	-	3'	2127268-2127670	2127169-2127670
GRMZM2G180254	10:2127169-2133571	-	5'	2133476-2133476	2133476-2133571
GRMZM2G181030	10:134853494-134857175	-	3'	134854638-134854987	134853494-134854987
GRMZM2G181030	10:134853494-134857175	-	5'	134856982-134857160	134856982-134857175
GRMZM2G181251	10:16210487-16218011	+	5'	16210496-16211186	16210487-16211186
GRMZM2G181251	10:16210487-16218011	+	3'	16217400-16218008	16217400-16218011
GRMZM2G301246	10:123975385-123983357	-	3'	123975395-123975834	123975385-123975834
GRMZM2G303655	10:13166025-13181015	-	3'	13166108-13166620	13166025-13166620
GRMZM2G306348	10:126552652-126565712	+	3'	126562449-126562449	126562449-126565712
GRMZM2G310453	10:84172039-84173883	+	5'	84172062-84172106	84172039-84172106
GRMZM2G310453	10:84172039-84173883	+	3'	84173507-84173827	84173507-84173883
GRMZM2G310674	10:16359818-16366109	+	5'	16360161-16360304	16359818-16360304
GRMZM2G312026	10:148866266-148890462	+	5'	148866377-148866529	148866266-148866529
GRMZM2G314661	10:4874406-4883122	+	5'	4874772-4874772	4874406-4874772
GRMZM2G314661	10:4874406-4883122	+	3'	4882710-4883107	4882710-4883122
GRMZM2G319138	10:99226682-99244656	-	5'	99244452-99244470	99244452-99244656
GRMZM2G320305	10:2693153-2697784	-	3'	2693389-2693389	2693153-2693389
GRMZM2G320305	10:2693153-2697784	-	5'	2697471-2697471	2697471-2697784
GRMZM2G322506	10:134678161-134683878	+	5'	134678381-134678381	134678161-134678381
GRMZM2G322506	10:134678161-134683878	+	3'	134683702-134683873	134683702-134683878
GRMZM2G333183	10:80582410-80593163	-	5'	80591250-80591250	80591250-80593163
GRMZM2G336326	10:15410669-15413297	-	3'	15410717-15411154	15410669-15411154
GRMZM2G336326	10:15410669-15413297	-	5'	15412846-15413276	15412846-15413297
GRMZM2G339820	10:89509332-89514239	-	3'	89509360-89509745	89509332-89509745
GRMZM2G341302	10:82113652-82121329	+	3'	82120304-82120388	82120304-82121329
GRMZM2G349709	10:115965892-115968152	+	5'	115965932-115966067	115965892-115966067
GRMZM2G349709	10:115965892-115968152	+	3'	115967797-115967827	115967797-115968152
GRMZM2G354834	10:141789769-141790690	-	3'	141789838-141790055	141789769-141790055
GRMZM2G354834	10:141789769-141790690	-	5'	141790530-141790651	141790530-141790690
GRMZM2G354867	10:141823070-141828595	+	3'	141828449-141828449	141828449-141828595
GRMZM2G356817	10:3163433-3173480	+	5'	3163435-3164700	3163433-3164700
GRMZM2G357737	10:89081502-89087919	+	3'	89087541-89087874	89087541-89087919
GRMZM2G365888	10:27274493-27282028	-	3'	27274598-27275084	27274493-27275084
GRMZM2G365888	10:27274493-27282028	-	5'	27281804-27281804	27281804-27282028
GRMZM2G366270	10:143557278-143560620	+	5'	143557315-143557562	143557278-143557562
GRMZM2G368902	10:63625071-63632413	+	5'	63625121-63625158	63625071-63625158
GRMZM2G390967	10:53877705-53881966	-	5'	53880771-53880771	53880771-53881966
GRMZM2G391042	10:140700653-140723957	-	5'	140723772-140723772	140723772-140723957
GRMZM2G393742	10:83551331-83557118	+	5'	83551464-83551760	83551331-83551760
GRMZM2G396846	10:142492748-142495005	+	5'	142492885-142493007	142492748-142493007
GRMZM2G396846	10:142492748-142495005	+	3'	142494524-142494888	142494524-142495005
GRMZM2G396856	10:142484991-142490265	+	3'	142489916-142490241	142489916-142490265
GRMZM2G405662	10:146674417-146675742	+	5'	146674441-146674562	146674417-146674562
GRMZM2G405662	10:146674417-146675742	+	3'	146675297-146675684	146675297-146675742
GRMZM2G406553	10:147728758-147740293	-	5'	147739890-147739958	147739890-147740293
GRMZM2G411691	10:75159516-75167249	+	5'	75164685-75164919	75159516-75164919
GRMZM2G411691	10:75159516-75167249	+	3'	75165686-75165686	75165686-75167249
GRMZM2G413943	10:11606668-11611901	-	3'	11606866-11606866	11606668-11606866
GRMZM2G419694	10:142392493-142395739	+	5'	142392553-142392870	142392493-142392870
GRMZM2G420801	10:101172876-101177456	-	3'	101173508-101173623	101172876-101173623
GRMZM2G420801	10:101172876-101177456	-	5'	101176797-101177424	101176797-101177456
GRMZM2G425798	10:111635997-111638634	+	3'	111638209-111638209	111638209-111638634
GRMZM2G427097	10:134077867-134082362	+	5'	134077909-134078602	134077867-134078602
GRMZM2G429237	10:133761217-133766761	+	3'	133766459-133766701	133766459-133766761
GRMZM2G432335	10:95223374-95246383	-	3'	95223679-95223703	95223374-95223703
GRMZM2G436448	10:96702139-96704963	-	3'	96702431-96702455	96702139-96702455
GRMZM2G436448	10:96702139-96704963	-	5'	96704787-96704829	96704787-96704963
GRMZM2G437481	10:126674265-126709743	-	3'	126674304-126674542	126674265-126674542
GRMZM2G438176	10:8856424-8861154	-	3'	8856644-8856746	8856424-8856746
GRMZM2G438178	10:141252659-141257271	+	5'	141252999-141253291	141252659-141253291
GRMZM2G438178	10:141252659-141257271	+	3'	141256250-141256321	141256250-141257271
GRMZM2G440259	10:147866224-147868334	+	5'	147866358-147867073	147866224-147867073
GRMZM2G440259	10:147866224-147868334	+	3'	147867991-147868279	147867991-147868334
GRMZM2G441031	10:4034900-4054083	+	5'	4035458-4035461	4034900-4035461
GRMZM2G443495	10:9583429-9592261	-	5'	9591892-9592124	9591892-9592261
GRMZM2G446895	10:80599349-80629976	+	3'	80629252-80629821	80629252-80629976
GRMZM2G451231	10:23789119-23796028	+	5'	23789344-23789344	23789119-23789344
GRMZM2G451716	10:111444979-111452991	+	3'	111452578-111452986	111452578-111452991
GRMZM2G455476	10:100039506-100045165	-	5'	100044907-100044907	100044907-100045165
GRMZM2G458283	10:139775688-139780505	-	3'	139775703-139776257	139775688-139776257
GRMZM2G458283	10:139775688-139780505	-	5'	139780172-139780301	139780172-139780505
GRMZM2G464176	10:146820367-146823607	+	5'	146820978-146820978	146820367-146820978
GRMZM2G464176	10:146820367-146823607	+	3'	146823033-146823033	146823033-146823607
GRMZM2G467640	10:110830023-110840549	-	3'	110830039-110830481	110830023-110830481
GRMZM2G467640	10:110830023-110840549	-	5'	110840286-110840449	110840286-110840549
GRMZM2G468799	10:8719784-8726794	+	5'	8720133-8720550	8719784-8720550
GRMZM2G471362	10:48644891-48655896	-	3'	48653940-48654413	48644891-48654413
GRMZM2G471362	10:48644891-48655896	-	5'	48654898-48655784	48654898-48655896
GRMZM2G473138	10:3998541-4023081	-	5'	4022650-4022973	4022650-4023081
GRMZM2G475882	10:147154383-147163276	-	5'	147162954-147163265	147162954-147163276
GRMZM2G478370	10:63767637-63828643	+	3'	63828157-63828614	63828157-63828643
GRMZM2G480171	10:144029868-144038681	+	5'	144030003-144030225	144029868-144030225
GRMZM2G480171	10:144029868-144038681	+	3'	144038185-144038674	144038185-144038681
GRMZM2G481471	10:16181483-16183662	+	3'	16182972-16183001	16182972-16183662
GRMZM2G547542	10:106969815-107000849	-	3'	106969915-106970463	106969815-106970463
GRMZM2G547542	10:106969815-107000849	-	5'	107000801-107000846	107000801-107000849
GRMZM2G700208	10:33356867-33361109	-	3'	33357029-33357029	33356867-33357029
GRMZM2G700208	10:33356867-33361109	-	5'	33360934-33360934	33360934-33361109
GRMZM2G700828	10:69233363-69238403	-	5'	69238258-69238339	69238258-69238403
GRMZM2G701585	10:102503919-102517054	+	5'	102503981-102504705	102503919-102504705
GRMZM2G701585	10:102503919-102517054	+	3'	102516281-102516836	102516281-102517054
GRMZM5G800975	10:133728389-133734987	+	3'	133734737-133734985	133734737-133734987
GRMZM5G801457	10:103436414-103453062	-	3'	103436473-103436838	103436414-103436838
GRMZM5G802395	10:12795544-12796736	+	5'	12796346-12796346	12795544-12796346
GRMZM5G802395	10:12795544-12796736	+	3'	12796579-12796579	12796579-12796736
GRMZM5G803318	10:4589306-4597725	-	5'	4596184-4597641	4596184-4597725
GRMZM5G803992	10:10825106-10831796	+	5'	10825169-10825292	10825106-10825292
GRMZM5G809546	10:52428891-52457242	-	5'	52457188-52457207	52457188-52457242
GRMZM5G810727	10:130306676-130310616	-	3'	130306701-130306941	130306676-130306941
GRMZM5G810727	10:130306676-130310616	-	5'	130310351-130310608	130310351-130310616
GRMZM5G812144	10:57296586-57308596	+	3'	57308145-57308486	57308145-57308596
GRMZM5G813055	10:126894324-126916091	+	3'	126915471-126915757	126915471-126916091
GRMZM5G818977	10:143740979-143743719	+	5'	143741016-143741107	143740979-143741107
GRMZM5G818977	10:143740979-143743719	+	3'	143743380-143743695	143743380-143743719
GRMZM5G822829	10:138489916-138499029	+	5'	138489998-138490226	138489916-138490226
GRMZM5G822829	10:138489916-138499029	+	3'	138498708-138498818	138498708-138499029
GRMZM5G827286	10:33024919-33029543	-	5'	33029343-33029483	33029343-33029543
GRMZM5G827485	10:130934509-130938207	-	3'	130935292-130935795	130934509-130935795
GRMZM5G828581	10:130929270-130935155	+	5'	130929441-130929547	130929270-130929547
GRMZM5G828581	10:130929270-130935155	+	3'	130934296-130934573	130934296-130935155
GRMZM5G836471	10:149246640-149251246	-	3'	149246720-149246721	149246640-149246721
GRMZM5G836567	10:137311616-137319567	+	5'	137311826-137311826	137311616-137311826
GRMZM5G838754	10:129033182-129036467	-	3'	129033371-129033600	129033182-129033600
GRMZM5G838754	10:129033182-129036467	-	5'	129036150-129036452	129036150-129036467
GRMZM5G845175	10:112413408-112421356	-	3'	112413693-112413930	112413408-112413930
GRMZM5G845175	10:112413408-112421356	-	5'	112420930-112421285	112420930-112421356
GRMZM5G851207	10:145014481-145016901	-	3'	145016455-145016455	145014481-145016455
GRMZM5G851490	10:87108601-87113561	-	3'	87108609-87108783	87108601-87108783
GRMZM5G851490	10:87108601-87113561	-	5'	87113347-87113347	87113347-87113561
GRMZM5G852877	10:96336101-96339652	+	5'	96336115-96336307	96336101-96336307
GRMZM5G852877	10:96336101-96339652	+	3'	96339290-96339634	96339290-96339652
GRMZM5G854604	10:143328260-143329271	-	3'	143328290-143328394	143328260-143328394
GRMZM5G854604	10:143328260-143329271	-	5'	143329059-143329153	143329059-143329271
GRMZM5G856076	10:9846262-9847347	+	5'	9846411-9846557	9846262-9846557
GRMZM5G856076	10:9846262-9847347	+	3'	9847113-9847129	9847113-9847347
GRMZM5G856084	10:82059743-82064097	-	3'	82059765-82060193	82059743-82060193
GRMZM5G856142	10:17085591-17088565	-	3'	17085934-17085943	17085591-17085943
GRMZM5G857930	10:147549152-147555643	-	3'	147549167-147549861	147549152-147549861
GRMZM5G857930	10:147549152-147555643	-	5'	147555019-147555475	147555019-147555643
GRMZM5G858454	10:96344493-96353326	-	3'	96344573-96344842	96344493-96344842
GRMZM5G858454	10:96344493-96353326	-	5'	96353152-96353240	96353152-96353326
GRMZM5G862276	10:31135262-31142551	-	3'	31141775-31142174	31135262-31142174
GRMZM5G862276	10:31135262-31142551	-	5'	31142359-31142478	31142359-31142551
GRMZM5G864693	10:149034279-149035993	-	3'	149034287-149034332	149034279-149034332
GRMZM5G864693	10:149034279-149035993	-	5'	149035497-149035982	149035497-149035993
GRMZM5G868647	10:23390454-23400438	-	5'	23400090-23400344	23400090-23400438
GRMZM5G880300	10:124207259-124212246	-	3'	124207549-124208015	124207259-124208015
GRMZM5G884600	10:138634673-138636639	-	5'	138636497-138636622	138636497-138636639
GRMZM5G885867	10:145906651-145910553	-	5'	145910119-145910532	145910119-145910553
GRMZM5G896983	10:143621470-143625024	-	3'	143622080-143622080	143621470-143622080
GRMZM5G896983	10:143621470-143625024	-	5'	143622658-143622658	143622658-143625024
GRMZM6G007923	10:18758262-18761686	+	5'	18758297-18758397	18758262-18758397
GRMZM6G007923	10:18758262-18761686	+	3'	18761398-18761647	18761398-18761686
GRMZM6G798998	10:136965980-136971418	-	3'	136966041-136966215	136965980-136966215
AC148152.3_FG008	2:231879007-231883651	-	3'	231879065-231879245	231879007-231879245
AC148152.3_FG008	2:231879007-231883651	-	5'	231883552-231883597	231883552-231883651
AC165178.2_FG004	2:182072482-182074488	-	3'	182073111-182073111	182072482-182073111
AC177831.3_FG004	2:49745415-49748553	-	3'	49745576-49745576	49745415-49745576
AC190750.2_FG014	2:2989727-3006852	+	3'	3006559-3006559	3006559-3006852
AC190788.2_FG004	2:200348576-200352010	-	3'	200349629-200349629	200348576-200349629
AC190788.2_FG004	2:200348576-200352010	-	5'	200350132-200350132	200350132-200352010
AC194970.5_FG002	2:207889756-207891510	-	3'	207890126-207890126	207889756-207890126
AC194970.5_FG002	2:207889756-207891510	-	5'	207891291-207891291	207891291-207891510
AC194970.5_FG004	2:208015141-208027559	+	3'	208027031-208027031	208027031-208027559
AC194970.5_FG005	2:207913885-207919749	-	5'	207919278-207919278	207919278-207919749
AC197056.3_FG005	2:76048942-76053314	-	5'	76053308-76053308	76053308-76053314
AC198353.5_FG001	2:189442268-189445102	+	5'	189442326-189442326	189442268-189442326
AC198353.5_FG001	2:189442268-189445102	+	3'	189444889-189444889	189444889-189445102
AC198353.5_FG004	2:189421295-189435492	+	3'	189435459-189435459	189435459-189435492
AC199765.4_FG008	2:27007865-27017346	+	3'	27017169-27017169	27017169-27017346
AC199782.5_FG001	2:195041622-195046011	-	5'	195045586-195045586	195045586-195046011
AC199782.5_FG002	2:195007956-195011724	+	5'	195008292-195008292	195007956-195008292
AC199782.5_FG002	2:195007956-195011724	+	3'	195011506-195011506	195011506-195011724
AC203957.3_FG004	2:175112104-175114044	-	3'	175112514-175112514	175112104-175112514
AC203957.3_FG004	2:175112104-175114044	-	5'	175113156-175113156	175113156-175114044
AC204717.3_FG005	2:163613197-163614611	-	3'	163613311-163613311	163613197-163613311
AC204953.3_FG002	2:139538714-139540168	-	3'	139539325-139539325	139538714-139539325
AC204953.3_FG002	2:139538714-139540168	-	5'	139540017-139540017	139540017-139540168
AC205673.3_FG006	2:197660258-197668897	-	3'	197661881-197661881	197660258-197661881
AC207533.2_FG002	2:152833263-152871540	+	5'	152833439-152833439	152833263-152833439
AC210003.2_FG015	2:4198393-4199249	-	3'	4198770-4198770	4198393-4198770
AC210003.2_FG015	2:4198393-4199249	-	5'	4199116-4199116	4199116-4199249
AC211164.5_FG004	2:193024853-193060700	-	3'	193025135-193025135	193024853-193025135
AC212835.3_FG002	2:21480753-21484274	+	3'	21483788-21483788	21483788-21484274
AC212859.3_FG007	2:26355601-26368743	+	5'	26355901-26355901	26355601-26355901
AC212859.3_FG007	2:26355601-26368743	+	3'	26368291-26368291	26368291-26368743
AC212859.3_FG008	2:26370584-26372597	-	3'	26370683-26371038	26370584-26371038
AC212859.3_FG008	2:26370584-26372597	-	5'	26372266-26372492	26372266-26372597
AC217293.3_FG007	2:232381528-232388310	-	3'	232381878-232381878	232381528-232381878
AC217293.3_FG007	2:232381528-232388310	-	5'	232388093-232388093	232388093-232388310
AC229978.2_FG002	2:176987627-176994624	-	5'	176994450-176994450	176994450-176994624
AC233910.1_FG001	2:198469129-198472370	-	3'	198469134-198469550	198469129-198469550
AC233910.1_FG001	2:198469129-198472370	-	5'	198472203-198472361	198472203-198472370
AC233910.1_FG010	2:198387109-198390484	-	3'	198387583-198387583	198387109-198387583
AC233910.1_FG010	2:198387109-198390484	-	5'	198390322-198390322	198390322-198390484
AC233952.1_FG006	2:210155033-210163228	+	5'	210155168-210155168	210155033-210155168
AC233966.1_FG001	2:153554895-153559249	-	3'	153555620-153555620	153554895-153555620
AC233967.1_FG001	2:55220677-55222847	-	3'	55220860-55220860	55220677-55220860
AC234091.1_FG001	2:119321697-119325386	-	3'	119321954-119321954	119321697-119321954
AC234091.1_FG001	2:119321697-119325386	-	5'	119325349-119325349	119325349-119325386
AC235541.1_FG002	2:70334019-70338378	-	5'	70338230-70338285	70338230-70338378
GRMZM2G000052	2:8996279-9001551	+	5'	8996296-8996443	8996279-8996443
GRMZM2G000166	2:13719532-13721282	-	5'	13721083-13721175	13721083-13721282
GRMZM2G000936	2:227370590-227376442	+	5'	227370951-227371695	227370590-227371695
GRMZM2G000936	2:227370590-227376442	+	3'	227375961-227376407	227375961-227376442
GRMZM2G000980	2:72415244-72420432	-	3'	72416123-72417129	72415244-72417129
GRMZM2G000980	2:72415244-72420432	-	5'	72420340-72420409	72420340-72420432
GRMZM2G001084	2:64381956-64420094	+	3'	64419552-64419933	64419552-64420094
GRMZM2G001289	2:8289423-8295761	+	5'	8289450-8289913	8289423-8289913
GRMZM2G001297	2:217350193-217356268	+	5'	217350439-217350439	217350193-217350439
GRMZM2G001334	2:8295857-8302653	-	5'	8302423-8302610	8302423-8302653
GRMZM2G001668	2:170363978-170373719	+	5'	170363991-170364249	170363978-170364249
GRMZM2G001777	2:230914333-230921551	-	3'	230914473-230914615	230914333-230914615
GRMZM2G001777	2:230914333-230921551	-	5'	230920803-230921499	230920803-230921551
GRMZM2G001820	2:203790757-203797876	+	5'	203790979-203791251	203790757-203791251
GRMZM2G002075	2:186805631-186808507	+	3'	186808061-186808459	186808061-186808507
GRMZM2G002142	2:186842682-186845850	-	3'	186842961-186842961	186842682-186842961
GRMZM2G002142	2:186842682-186845850	-	5'	186845670-186845670	186845670-186845850
GRMZM2G002569	2:182994988-182999341	+	5'	182995589-182995880	182994988-182995880
GRMZM2G002569	2:182994988-182999341	+	3'	182998900-182999190	182998900-182999341
GRMZM2G002851	2:198678315-198684468	-	3'	198678339-198678615	198678315-198678615
GRMZM2G002851	2:198678315-198684468	-	5'	198684373-198684423	198684373-198684468
GRMZM2G002879	2:203291296-203297929	+	5'	203291345-203291552	203291296-203291552
GRMZM2G002978	2:59987028-59992379	-	3'	59987056-59987442	59987028-59987442
GRMZM2G002978	2:59987028-59992379	-	5'	59992314-59992370	59992314-59992379
GRMZM2G003043	2:224644536-224652219	-	3'	224644895-224646549	224644536-224646549
GRMZM2G003043	2:224644536-224652219	-	5'	224652018-224652148	224652018-224652219
GRMZM2G003252	2:217997898-218002091	-	5'	218001952-218001975	218001952-218002091
GRMZM2G003755	2:134668150-134769577	-	5'	134769089-134769548	134769089-134769577
GRMZM2G003775	2:28759334-28770472	+	5'	28759345-28759346	28759334-28759346
GRMZM2G004188	2:195089013-195093450	+	5'	195089098-195089179	195089013-195089179
GRMZM2G004188	2:195089013-195093450	+	3'	195092675-195093046	195092675-195093450
GRMZM2G004305	2:6462123-6468812	+	5'	6462158-6462282	6462123-6462282
GRMZM2G004305	2:6462123-6468812	+	3'	6468231-6468707	6468231-6468812
GRMZM2G005040	2:10384078-10389716	+	3'	10389444-10389573	10389444-10389716
GRMZM2G005103	2:217946325-217950747	+	5'	217946561-217946686	217946325-217946686
GRMZM2G005107	2:10371784-10379640	-	5'	10378873-10379329	10378873-10379640
GRMZM2G005146	2:184401672-184403755	+	5'	184401793-184402001	184401672-184402001
[truncated: 6,901 more rows]
